# Supplementary material for: Novel synthesis of fused spiro piperidone-cyclopropanes from cyclopropyl amides and electron-deficient alkenes
Source: Royal Society of Chemistry journal article supplement (doi:10.1039/d1ob00214g), 2021-01-01
Supplement: d1ob00214g1.pdf [file d1ob00214g1.pdf]

## Supporting Information

### Novel synthesis of fused spiro piperidone-cyclopropanes from cyclopropyl amides and electron-deficient alkene

Xiao-Dan Han<sup>1</sup>, Gao-Liang Peng<sup>2</sup>, Hui-Bin Wang<sup>1</sup>, Lei Wu<sup>1</sup>, Jian-ping Fu<sup>1</sup>, Zhong-Sheng Tang<sup>1</sup>,  
Ju-Wu Hu<sup>1\*</sup>, Wei Xiong<sup>1\*</sup>

1) Department of Applied Chemistry, Jiang Xi Academic of Sciences, Nanchang, 330096, China

2) Jiangxi university of Applied Science, Nanchang, 330100, China

email: [hjw19771985@163.com](mailto:hjw19771985@163.com) or [xiongwei19821985@sina.com](mailto:xiongwei19821985@sina.com)

#### I. Crystal data and ORTEP drawing of compound 3a and 5d

Crystal data for **3a**: C<sub>18</sub>H<sub>21</sub>NO<sub>4</sub>, colorless crystal, *M* = 315.36, orthorhombic, Pnma, *a* = 15.2387(4) Å, *b* = 10.3818(4) Å, *c* = 9.6545(3) Å,  $\alpha = 90.0^\circ$ ,  $\beta = 90.0^\circ$ ,  $\gamma = 90.0^\circ$ , *V* = 1527.39(9) Å<sup>3</sup>, *Z* = 4, *T* = 150 K, *F*<sub>000</sub> = 672, *R*<sub>1</sub> = 0.0692(1315), *wR*<sub>2</sub> = 0.1658(1426). CCDC1948958.

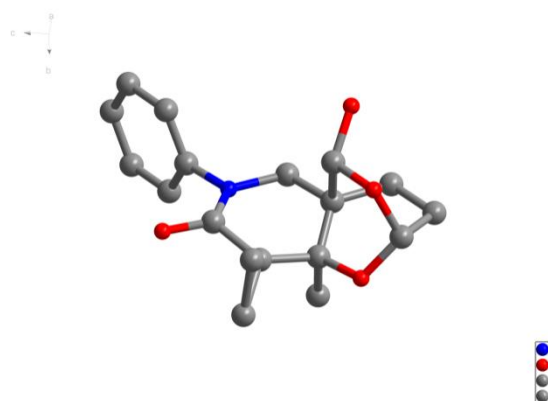

Compound 3a

Crystal data for **5d**: C<sub>16</sub>H<sub>16</sub>N<sub>2</sub>O, colorless crystal, *M* = 250.29, monoclinic, P21/c, *a* = 11.4303(7) Å, *b* = 23.1780(16) Å, *c* = 10.3616(8) Å,  $\alpha = 90.0^\circ$ ,  $\beta = 91.780(6)^\circ$ ,  $\gamma = 90.0^\circ$ , *V* = 2743.8(3) Å<sup>3</sup>, *Z* = 8, *T* = 293 K, *F*<sub>000</sub> = 1056, *R*<sub>1</sub> = 0.0728(3987), *wR*<sub>2</sub> = 0.2095(4833). CCDC 1948938.

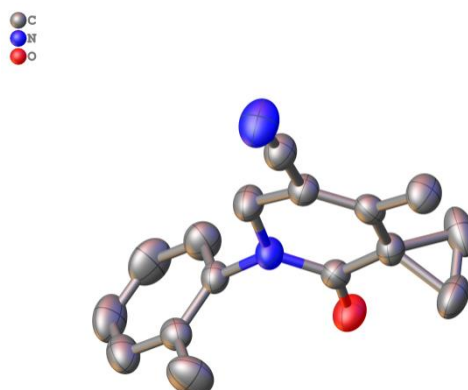

Compound 5d

#### II. Copies of <sup>1</sup>H NMR and <sup>13</sup>C NMR spectra of compounds 3, 4 and 5

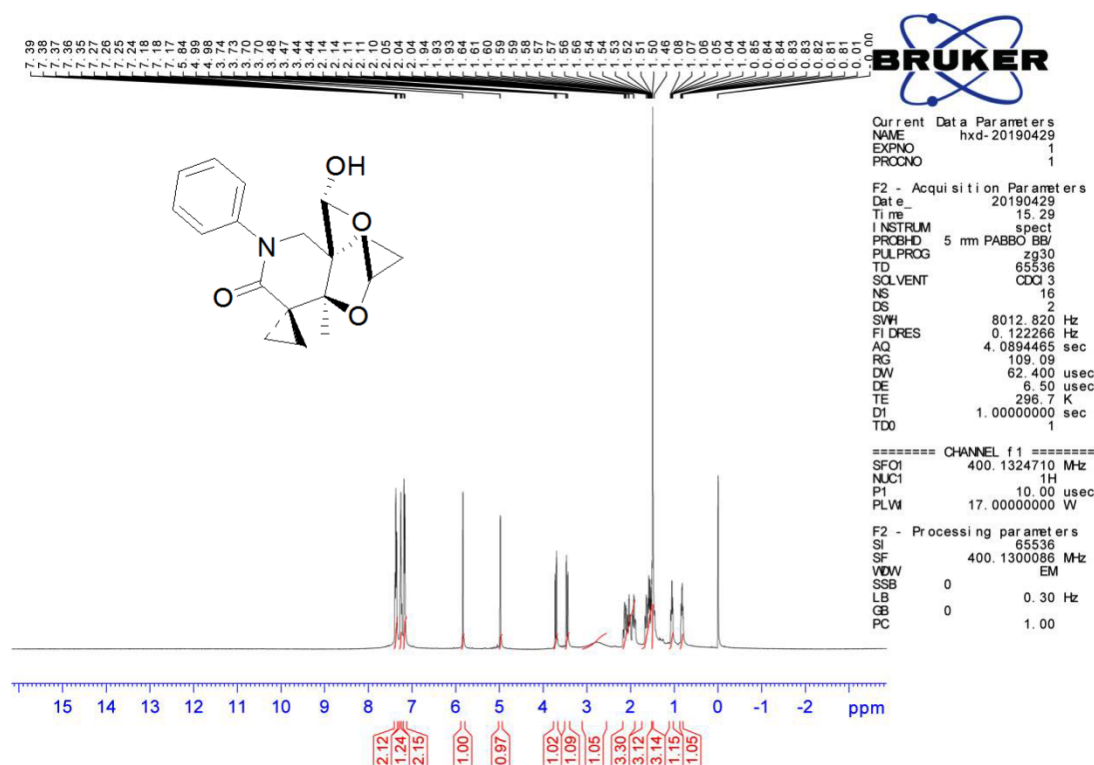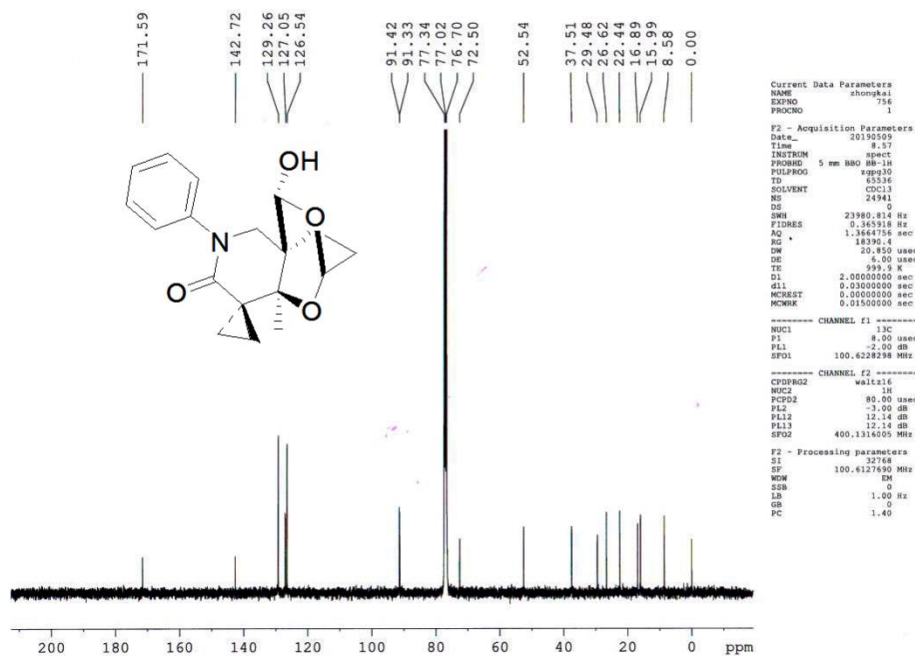

Figure 1. <sup>1</sup>H-(upper) and <sup>13</sup>C-NMR (lower) spectra of compound 3a.

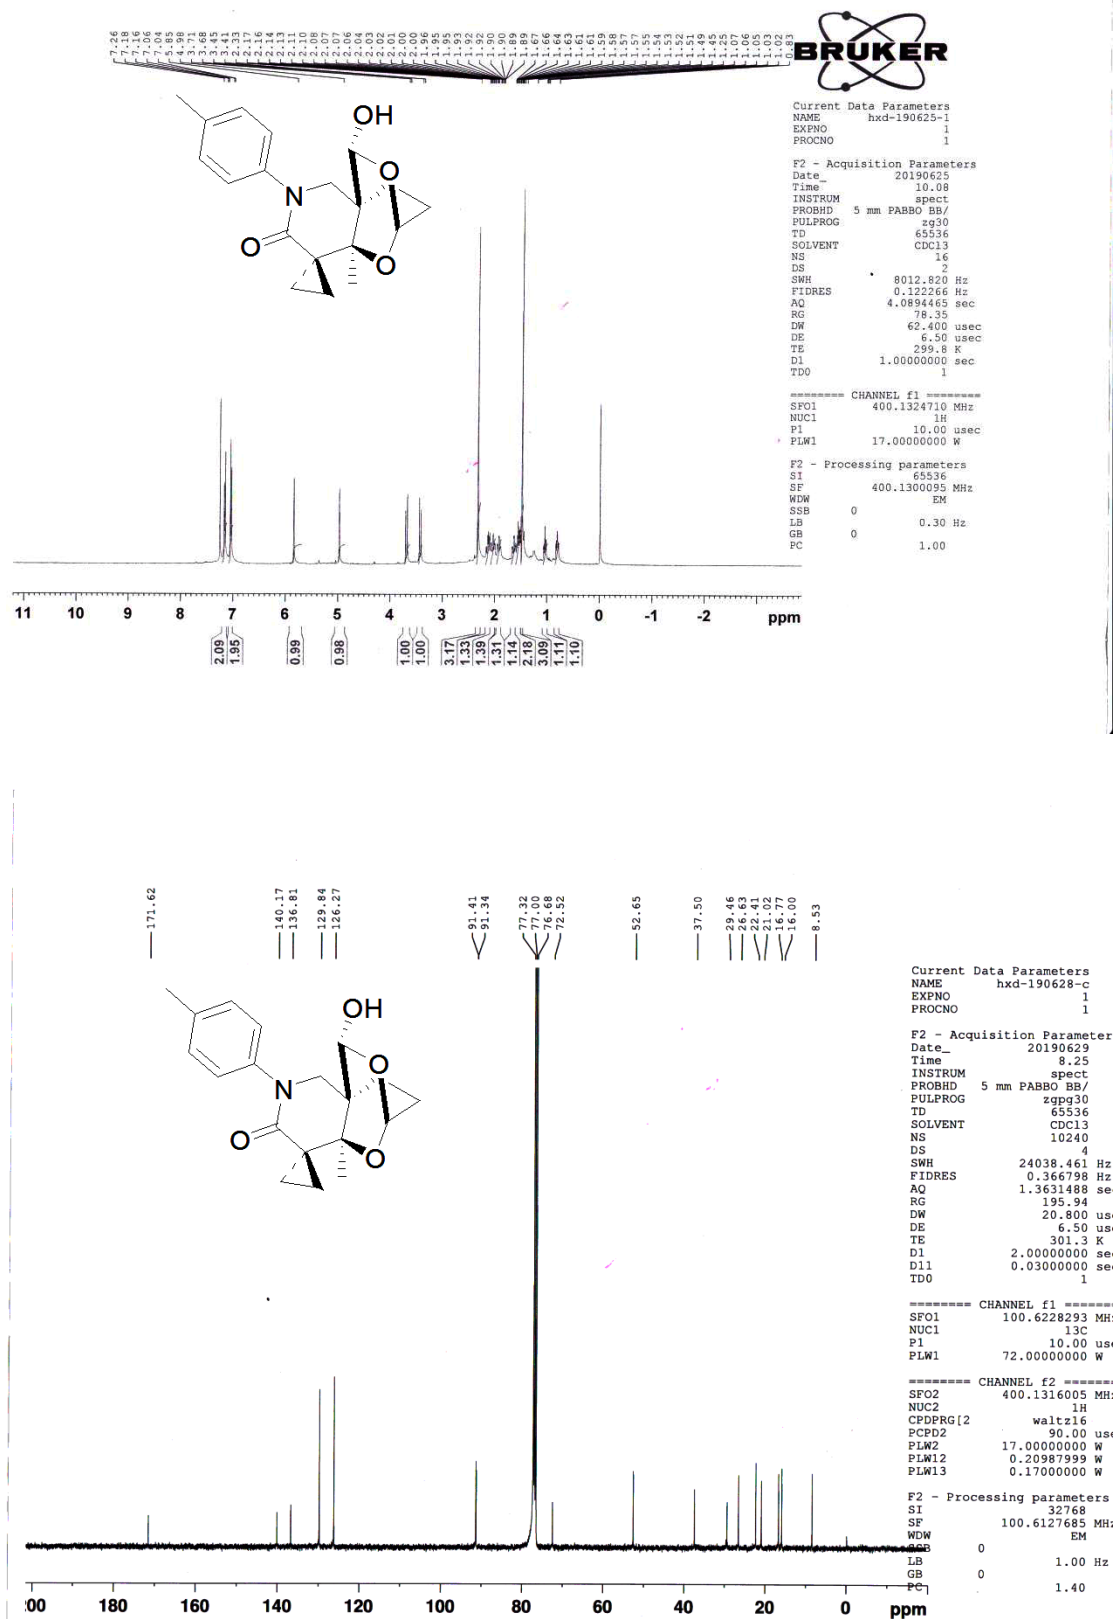

Figure 2.  $^1\text{H}$ - (upper) and  $^{13}\text{C}$ -NMR (lower) spectra of compound 3b.

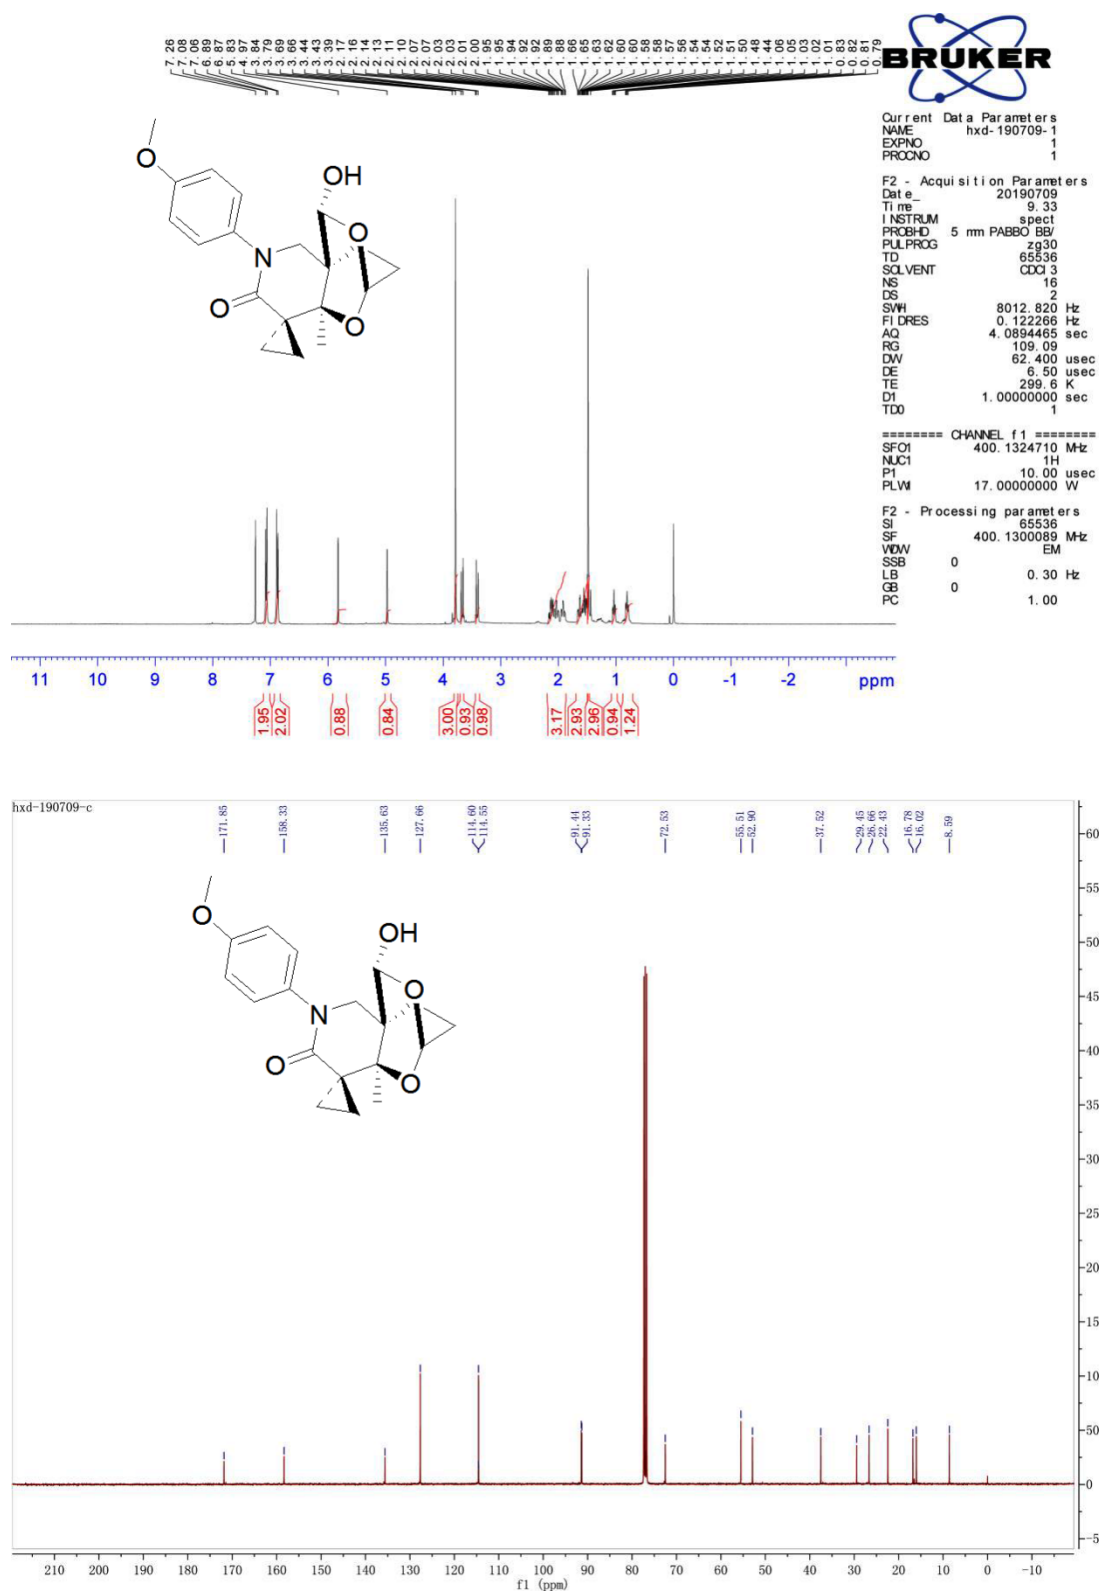

**Figure 3.** <sup>1</sup>H-(upper) and <sup>13</sup>C-NMR (lower) spectra of compound **3c**.

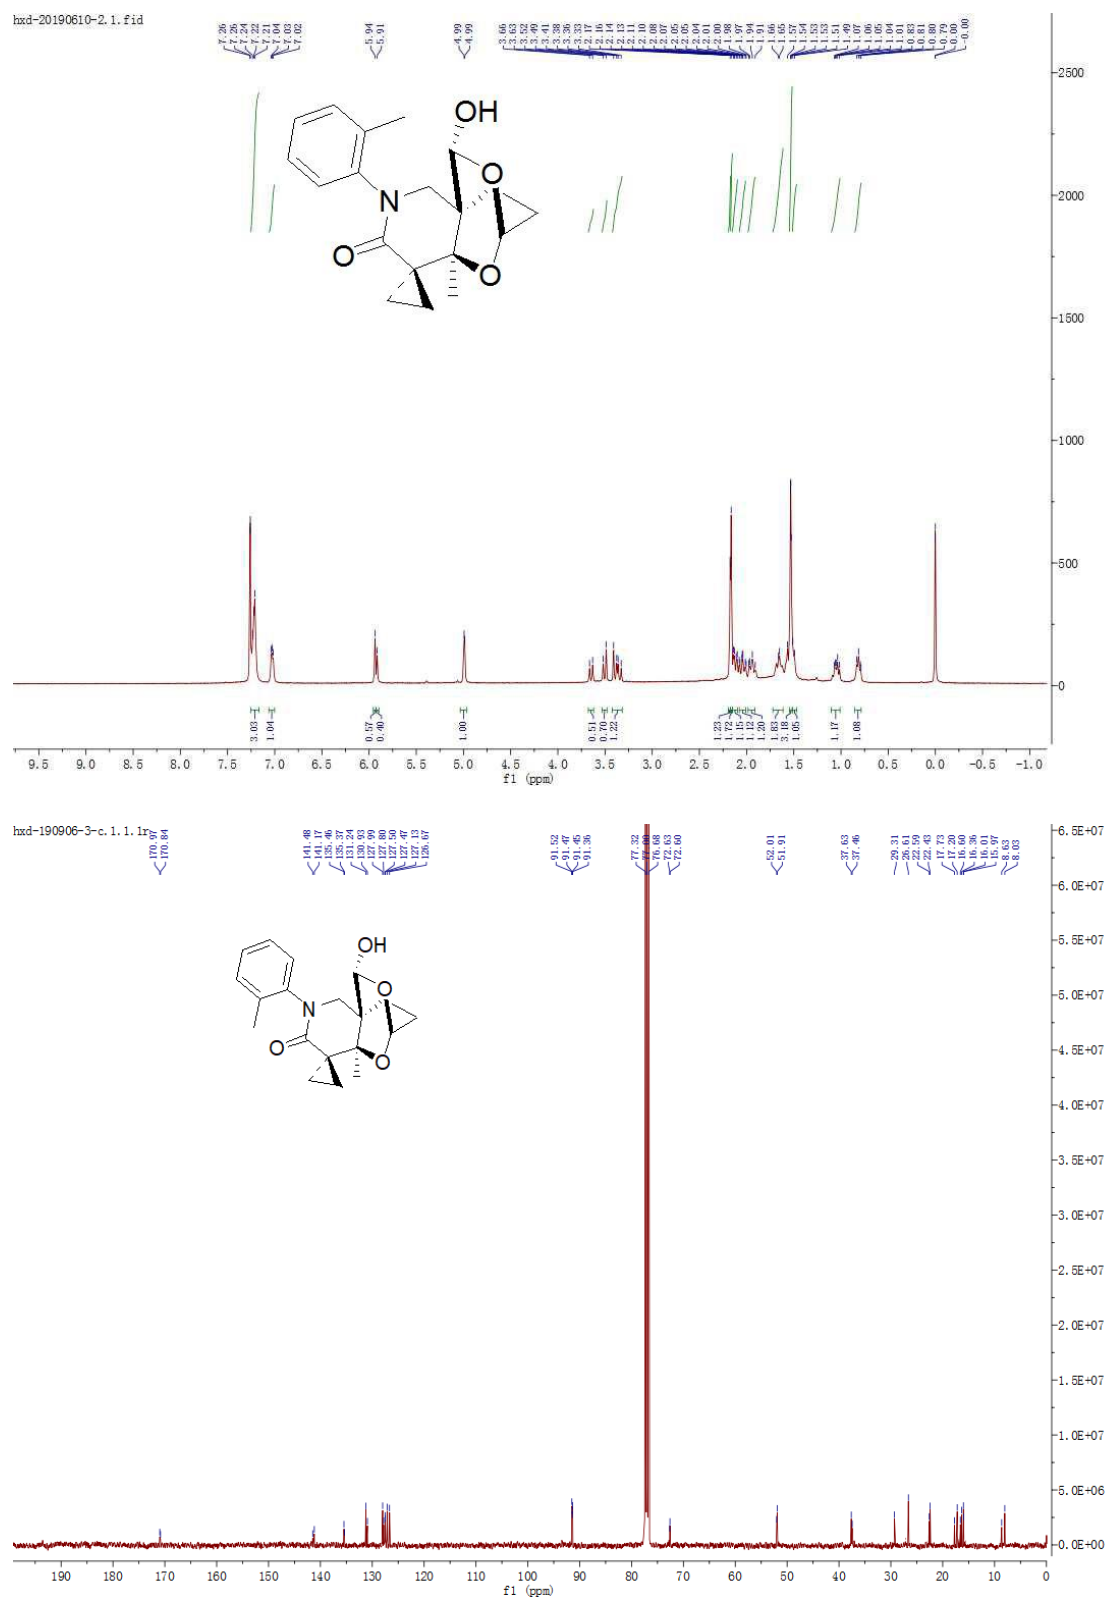

**Figure 4.**  $^1\text{H}$ -(upper) and  $^{13}\text{C}$ -NMR (lower) spectra of compound **3d**.

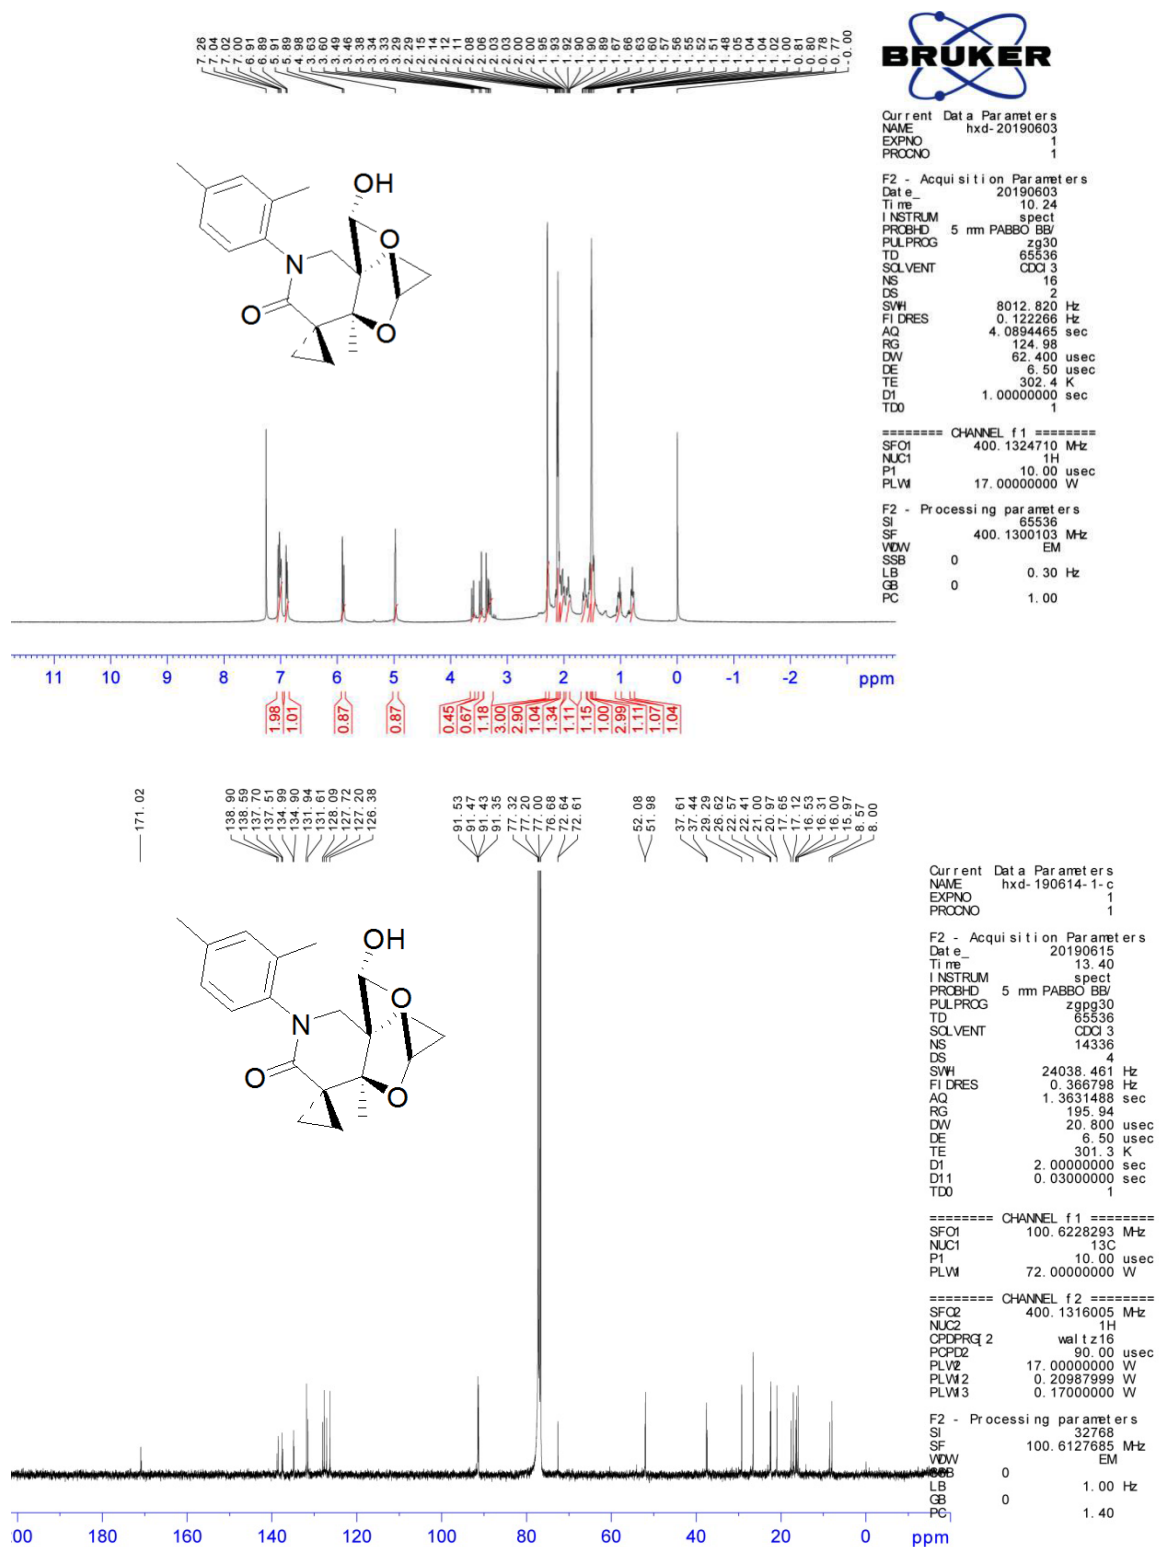

Figure 5. <sup>1</sup>H-(upper) and <sup>13</sup>C-NMR (lower) spectra of compound **3e**.

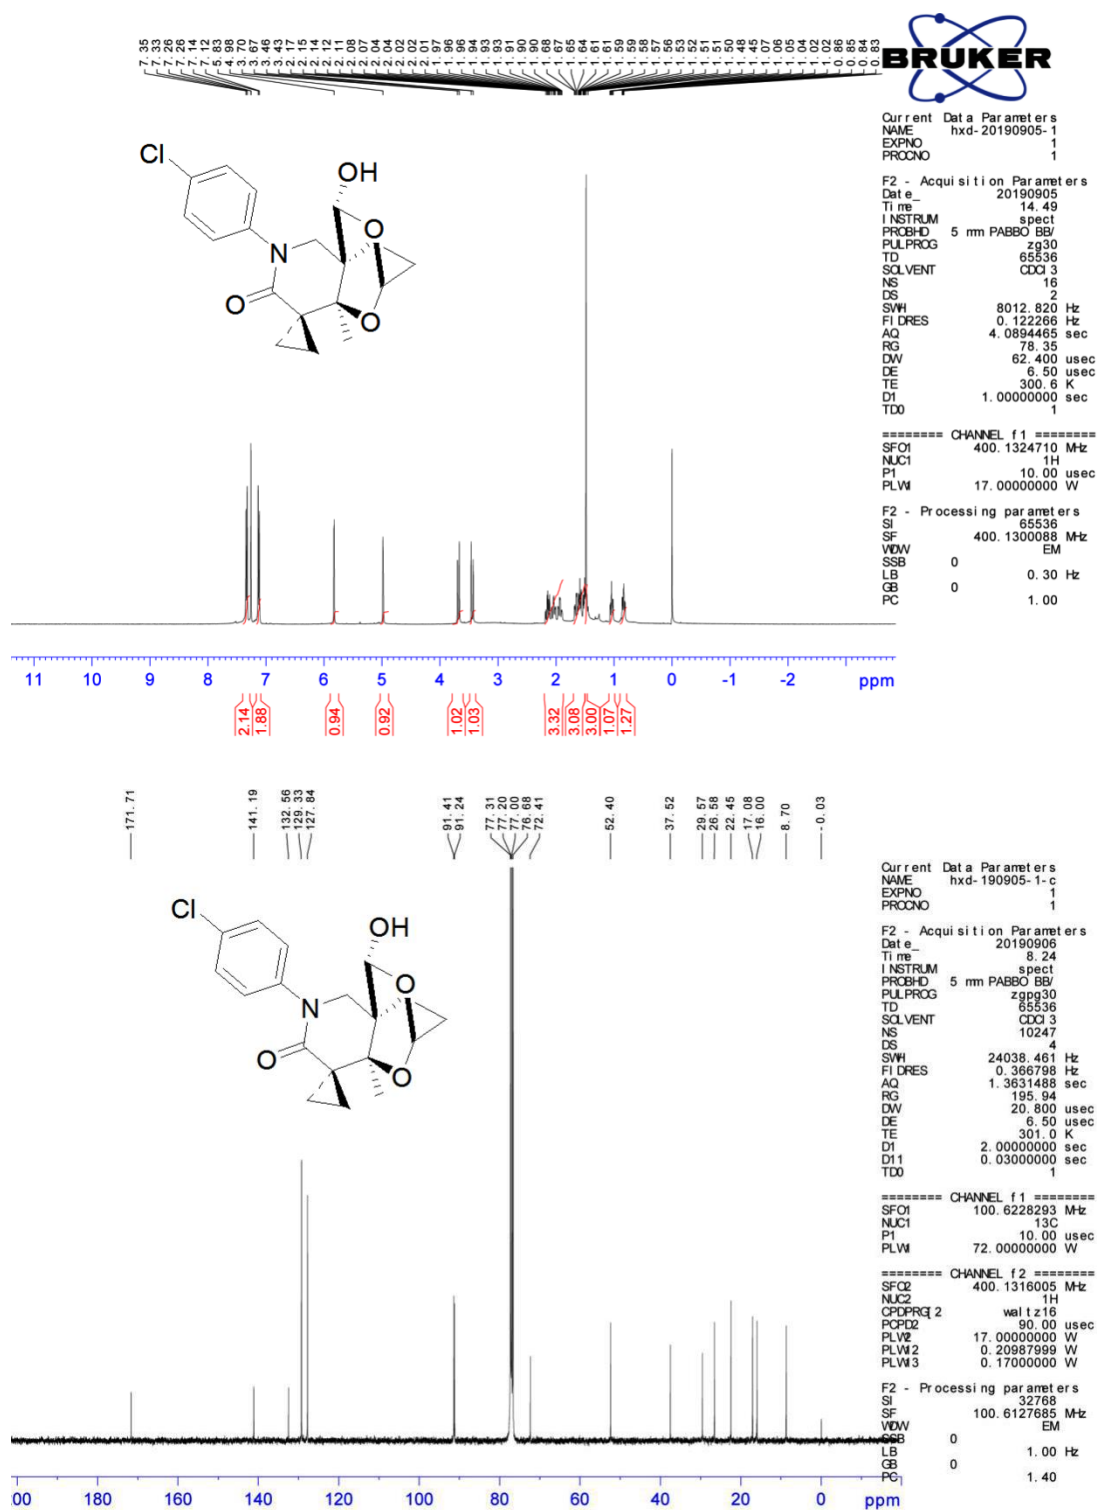

Figure 6.  $^1\text{H}$ -(upper) and  $^{13}\text{C}$ -NMR (lower) spectra of compound 3f.

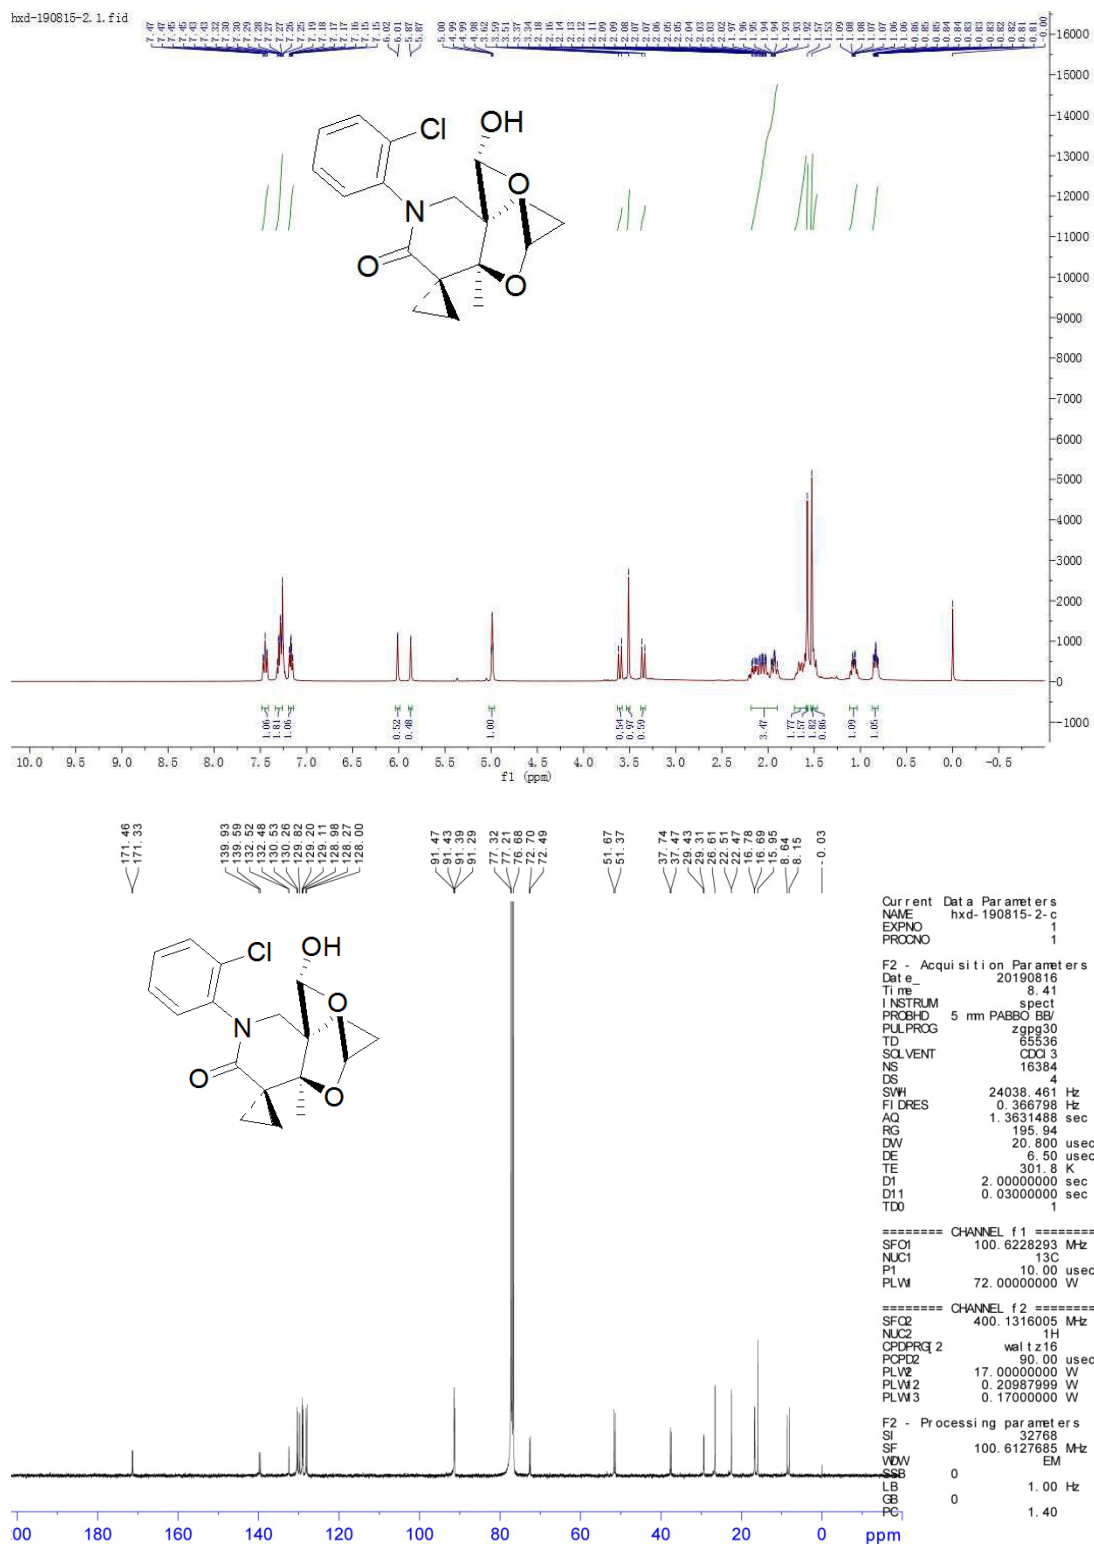

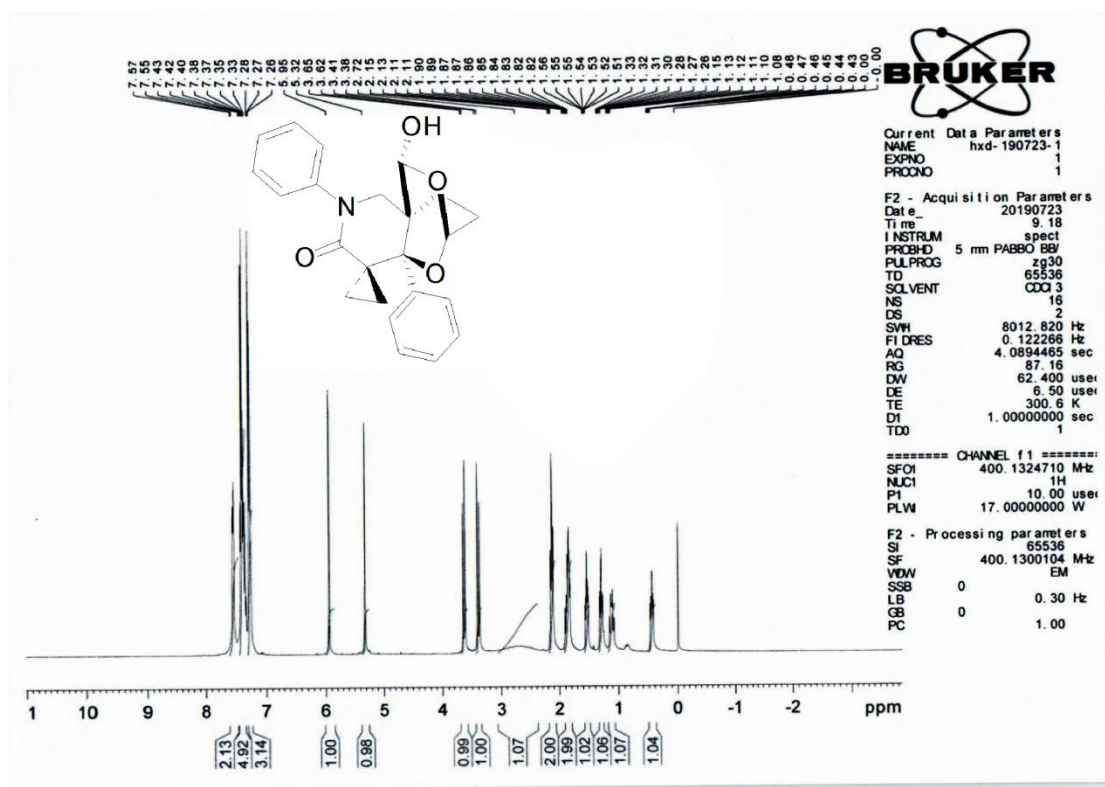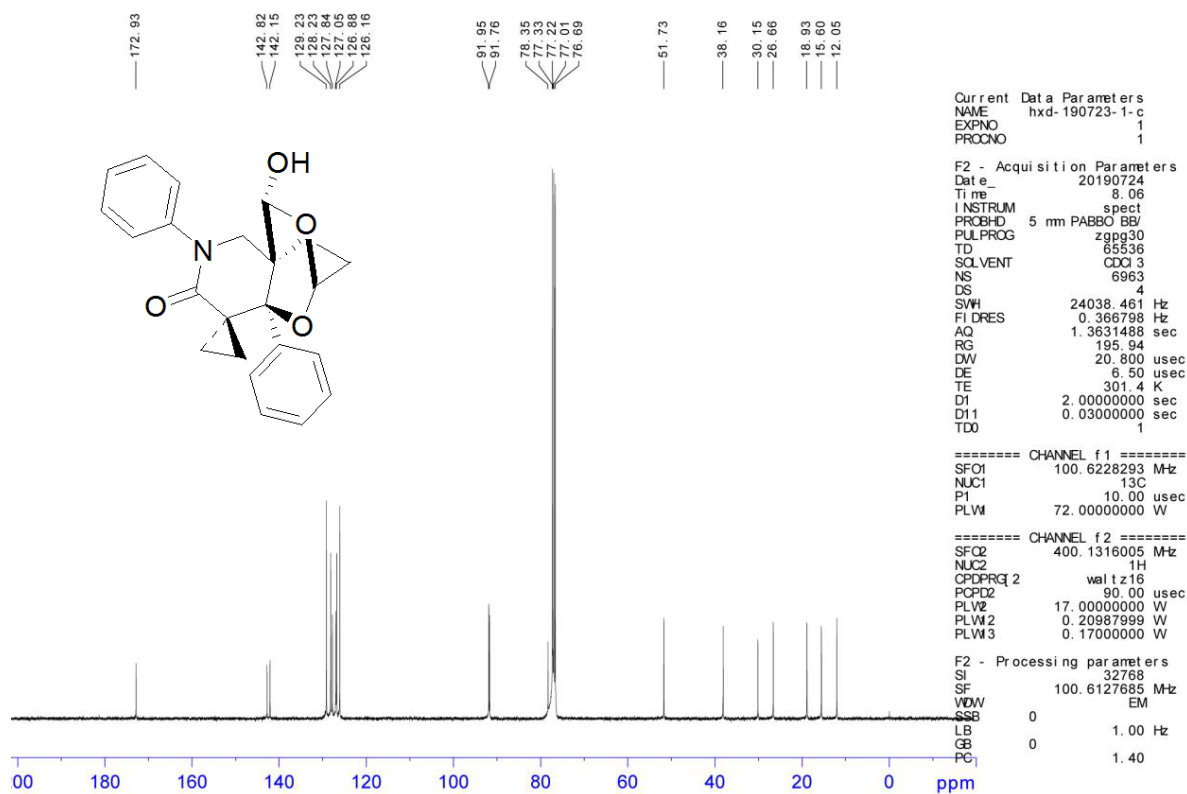

Figure 8. <sup>1</sup>H-(upper) and <sup>13</sup>C-NMR (lower) spectra of compound 3h.

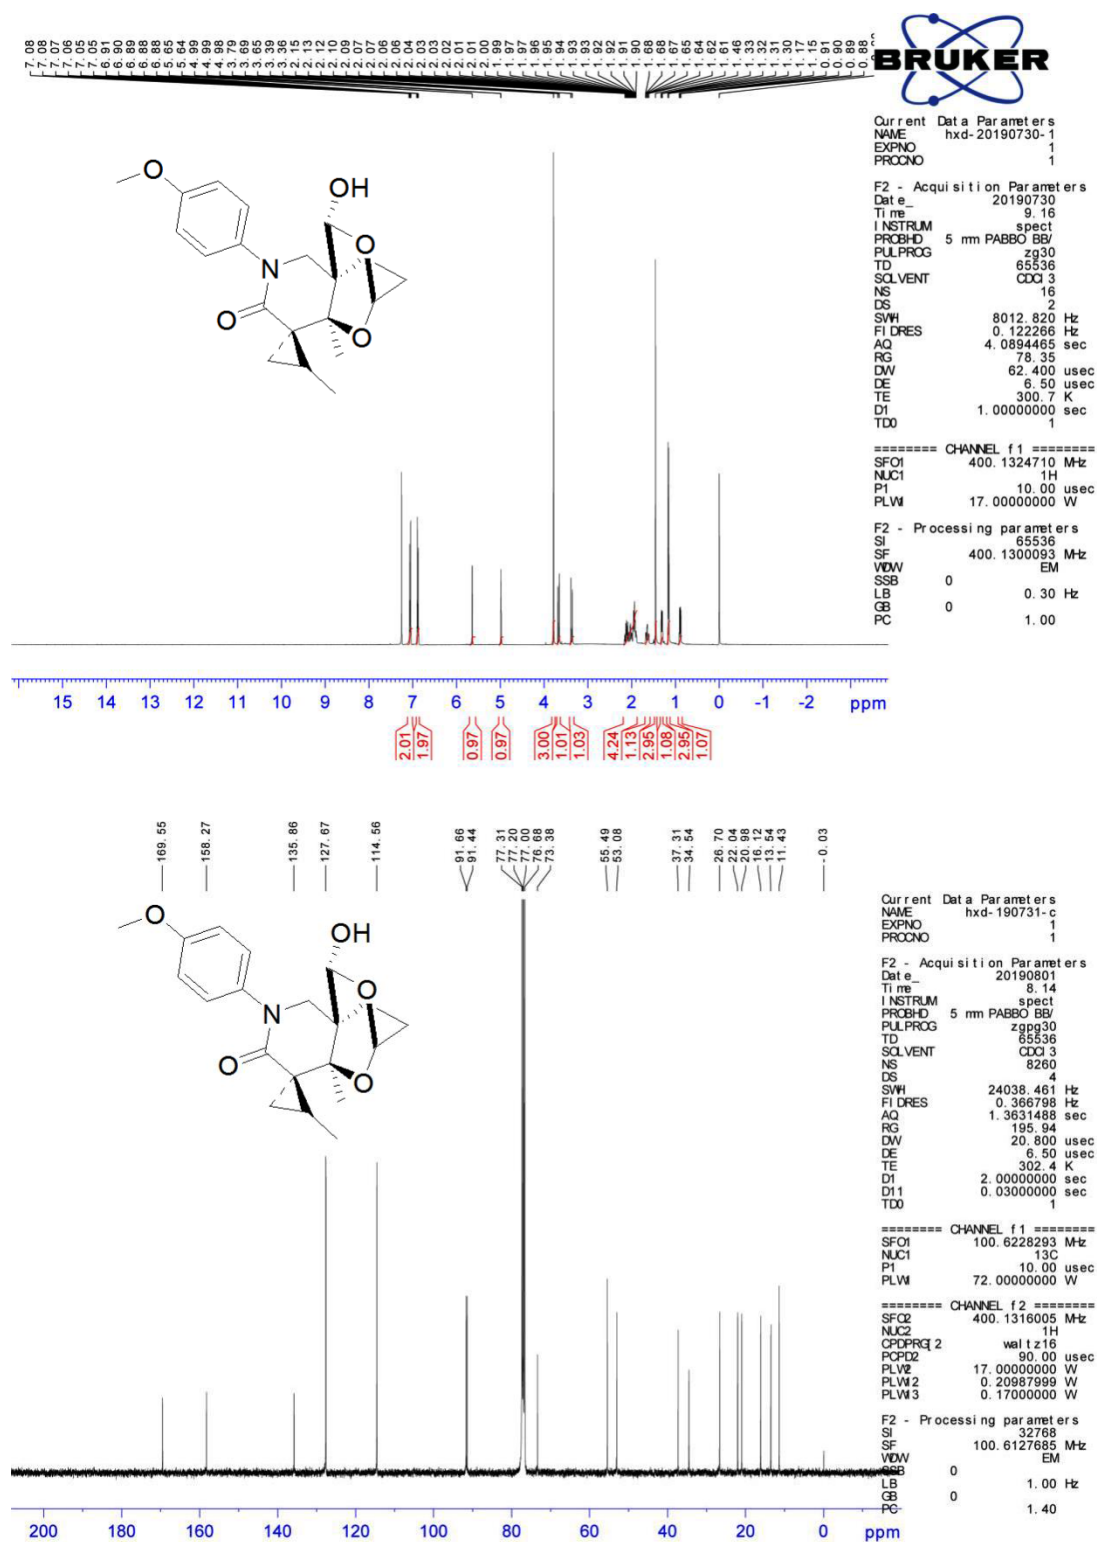

Figure 9. <sup>1</sup>H-(upper) and <sup>13</sup>C-NMR (lower) spectra of compound **3j**.

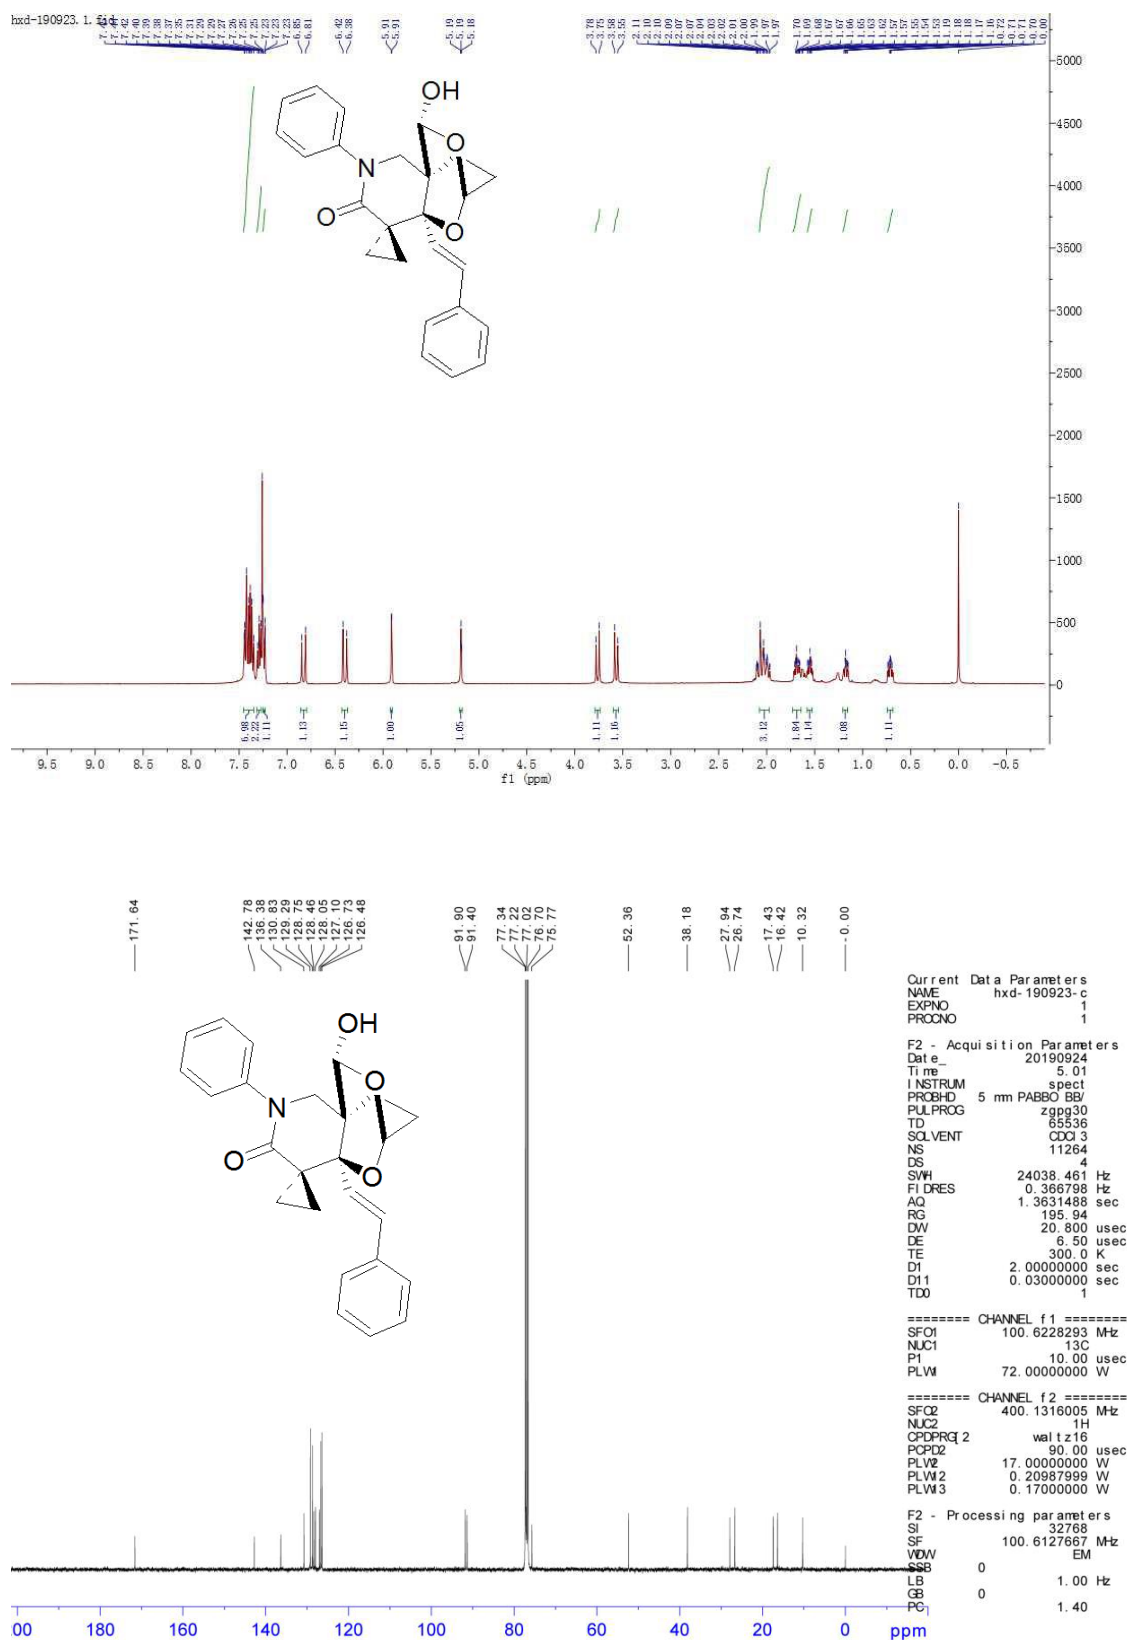

**Figure 10.** <sup>1</sup>H-(upper) and <sup>13</sup>C-NMR (lower) spectra of compound **3k**.

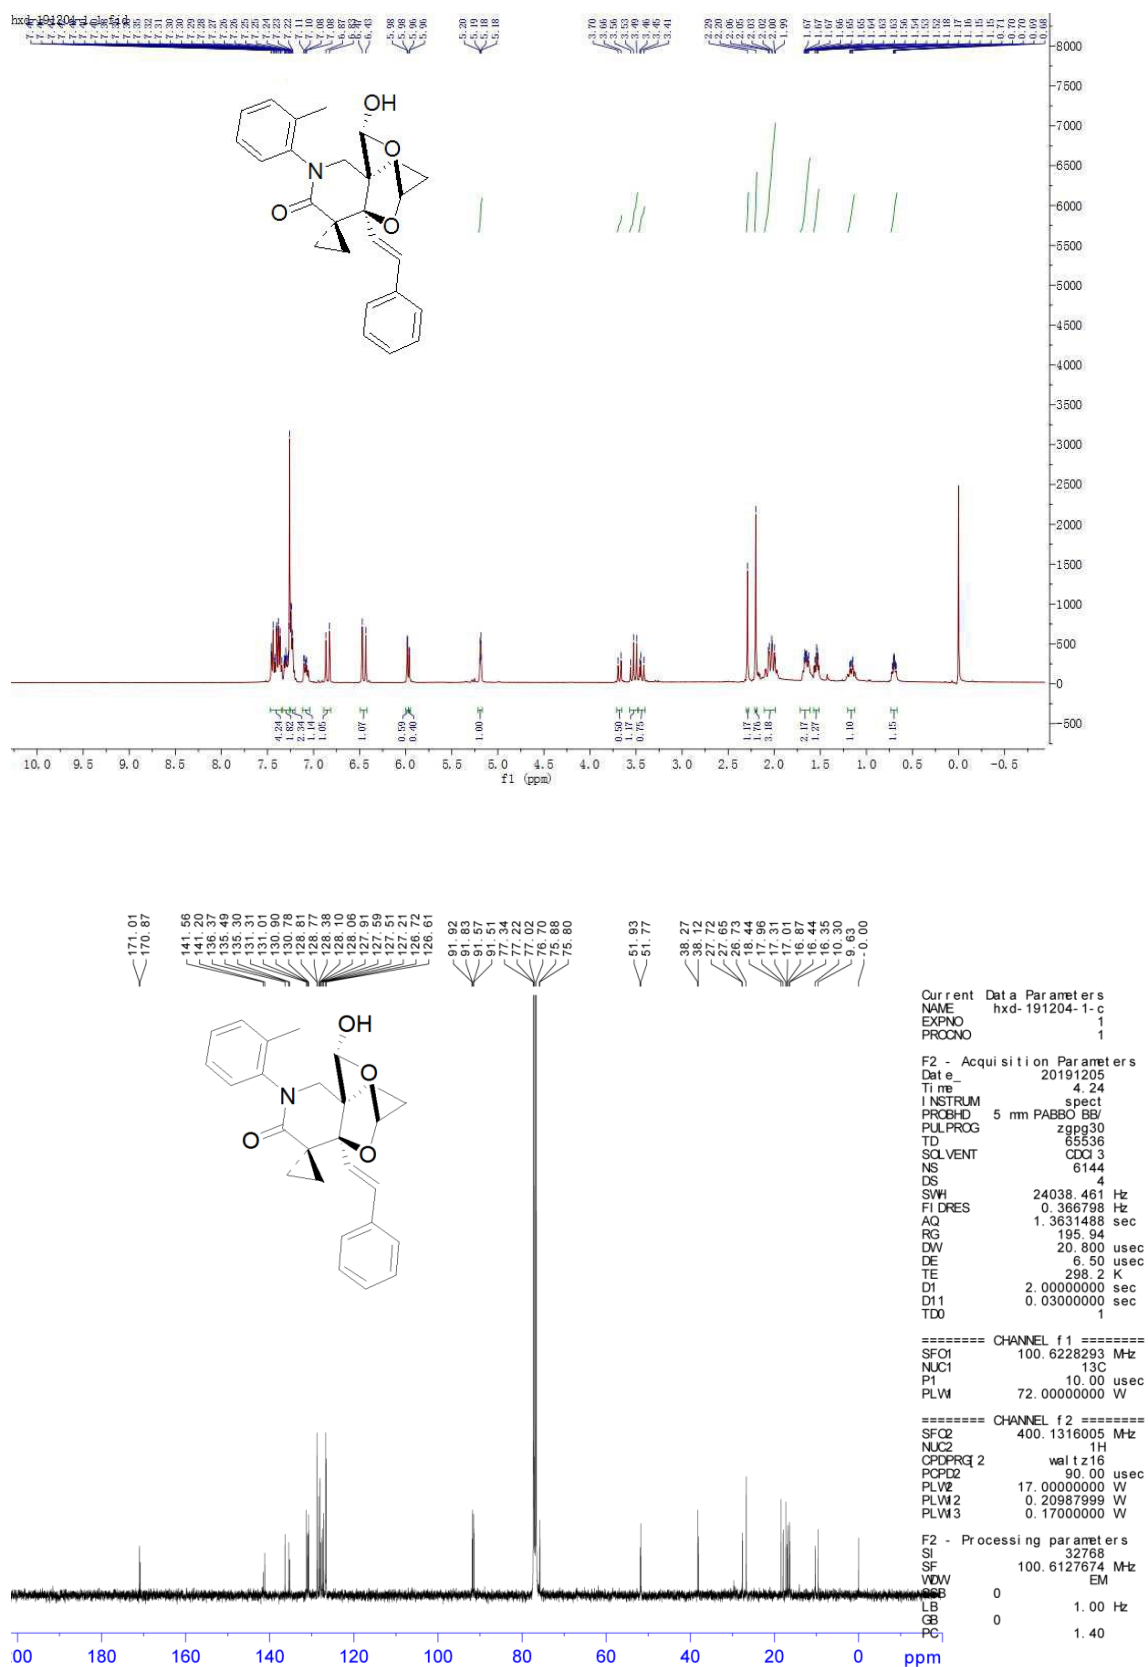

Figure 11. <sup>1</sup>H-(upper) and <sup>13</sup>C-NMR (lower) spectra of compound **3l**.

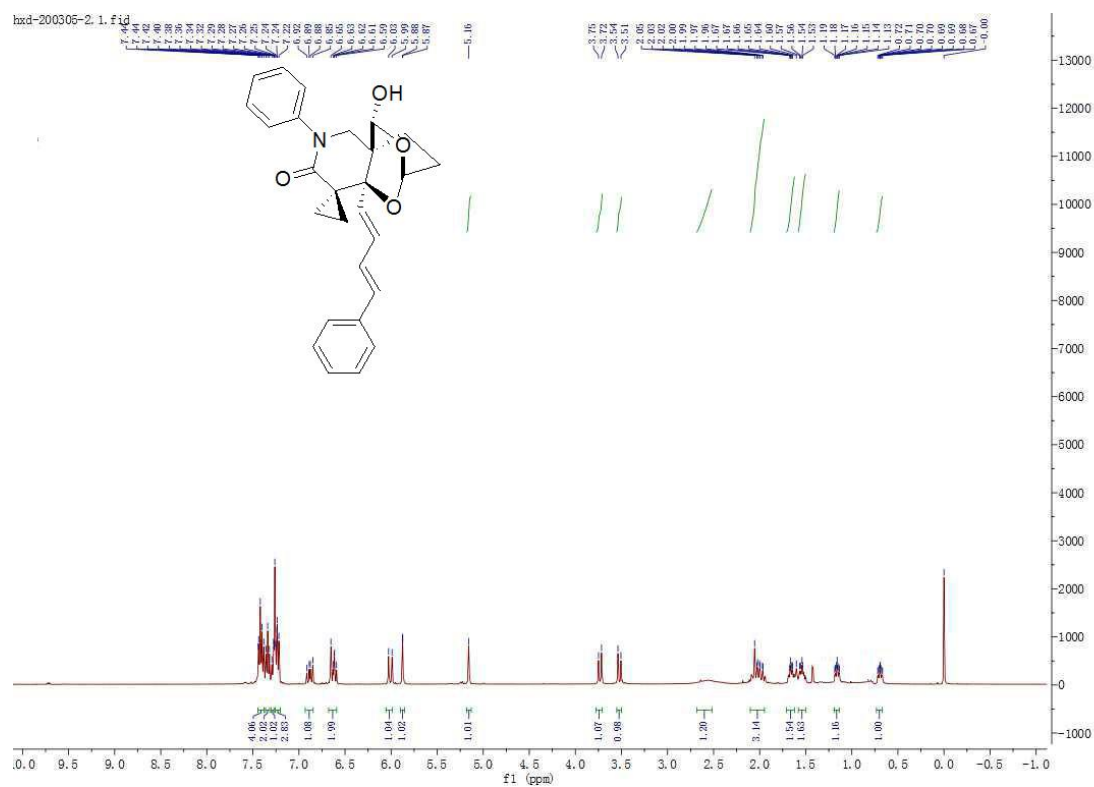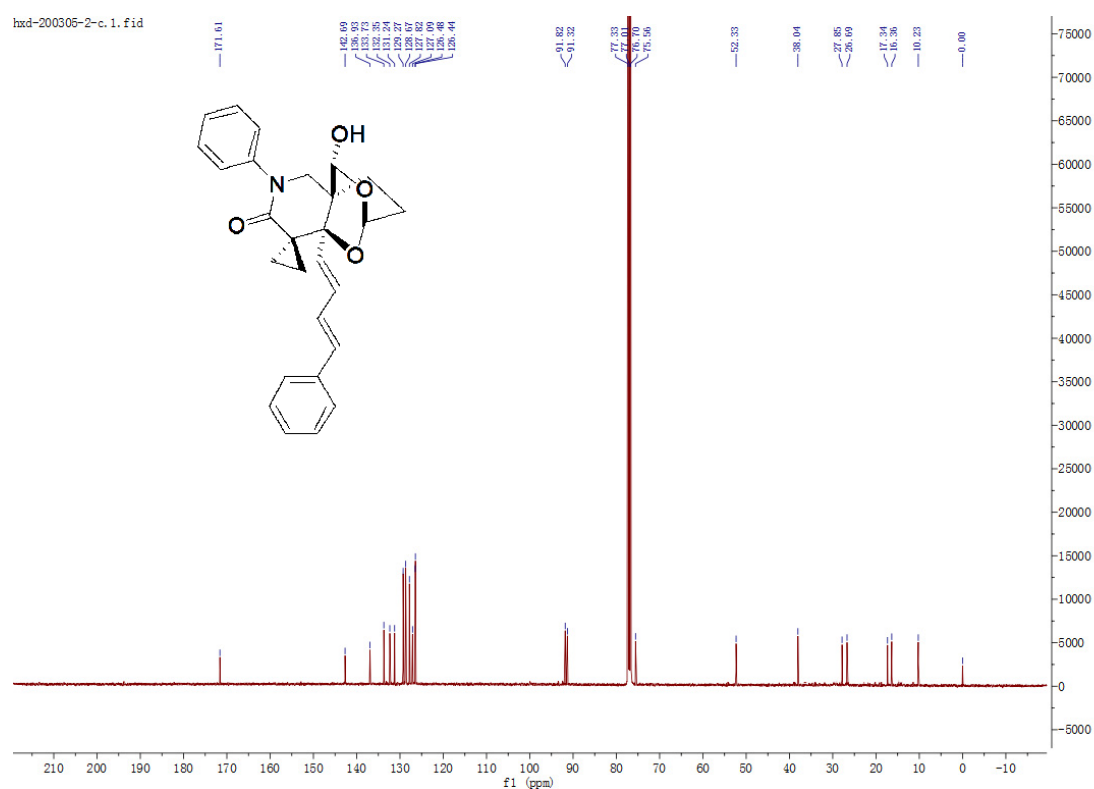

**Figure 12.** <sup>1</sup>H-(upper) and <sup>13</sup>C-NMR (lower) spectra of compound **3m**.

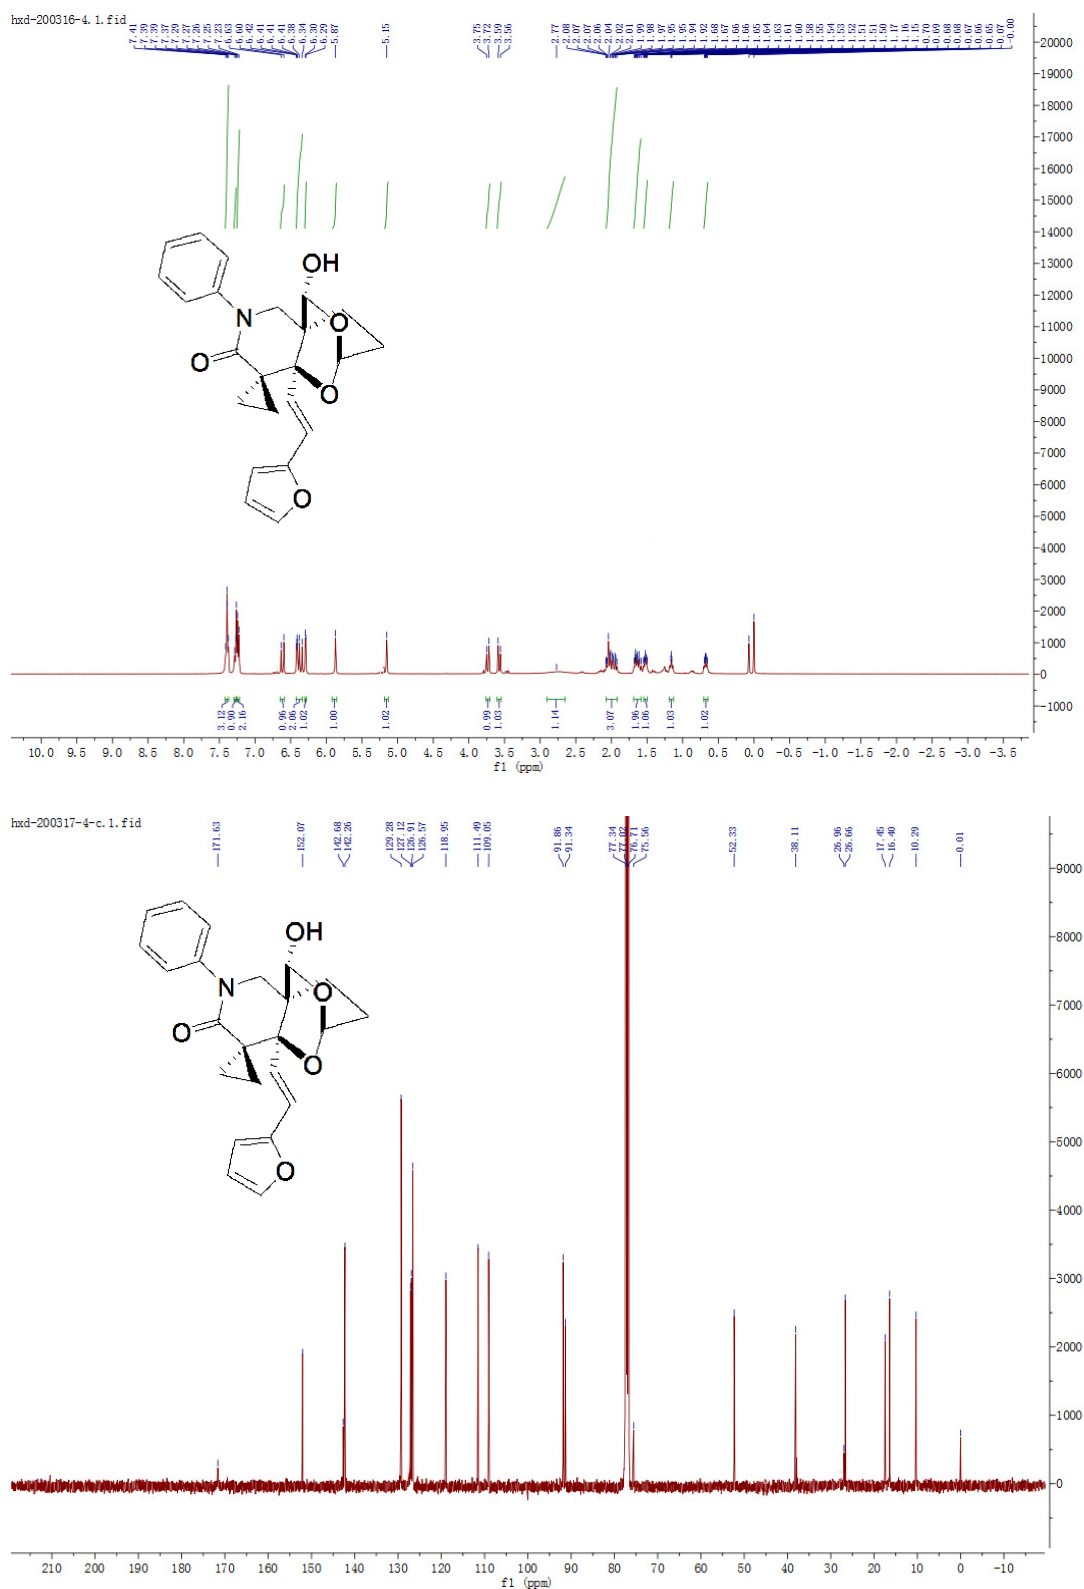

**Figure 13.**  $^1\text{H}$ -(upper) and  $^{13}\text{C}$ -NMR (lower) spectra of compound **3n**.



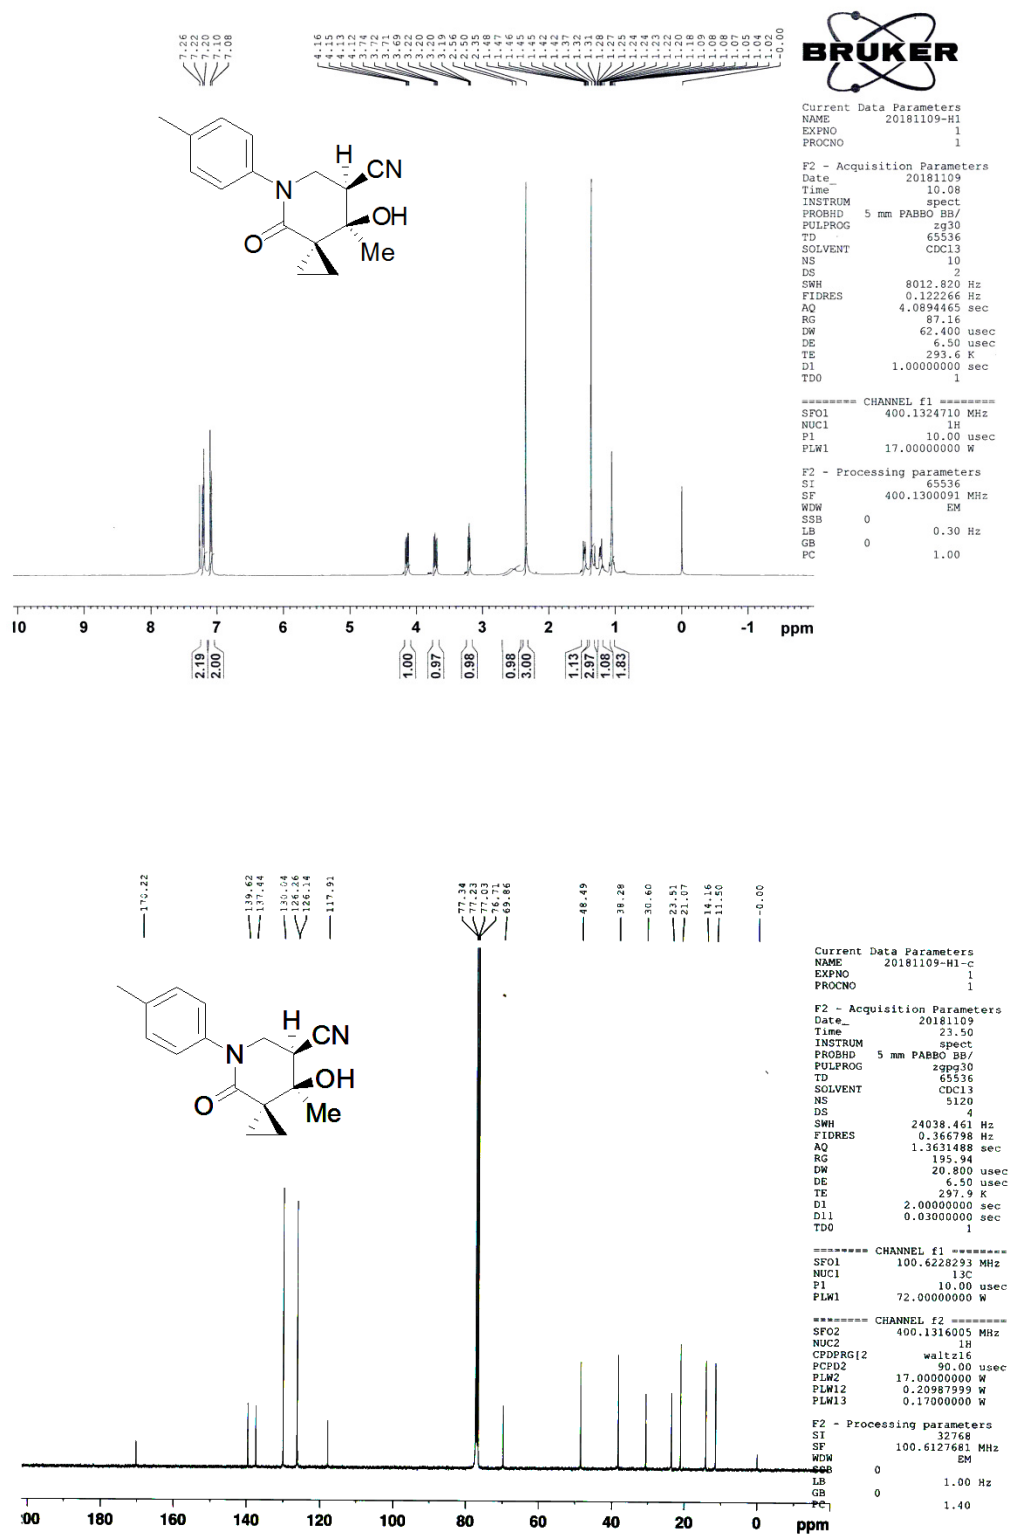

Figure 15. <sup>1</sup>H-(upper) and <sup>13</sup>C-NMR (lower) spectra of compound **4b**.

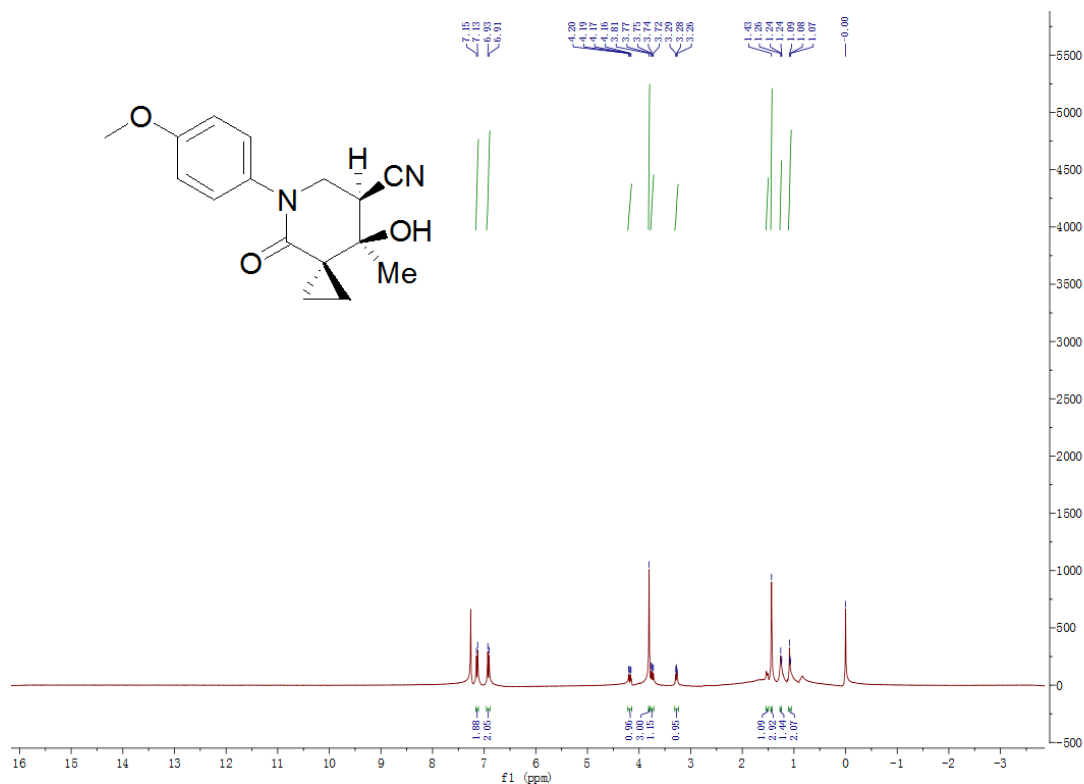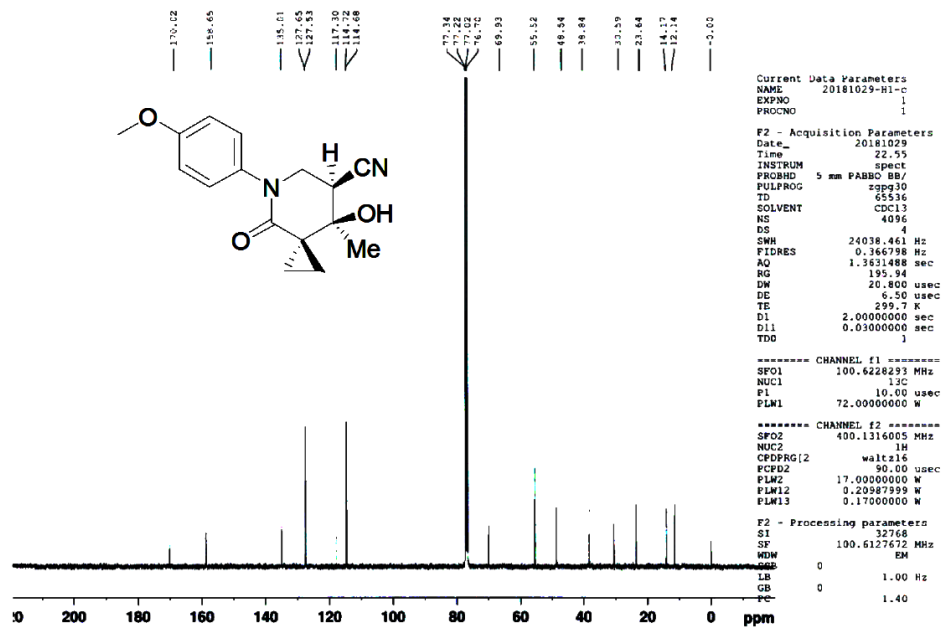

Figure 16. <sup>1</sup>H-(upper) and <sup>13</sup>C-NMR (lower) spectra of compound 4c.

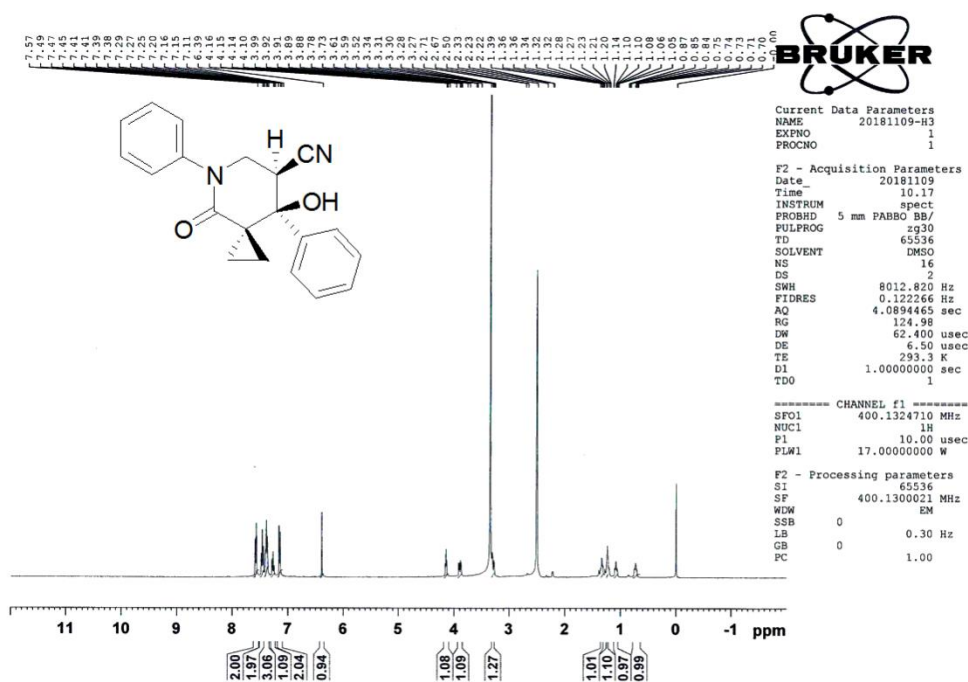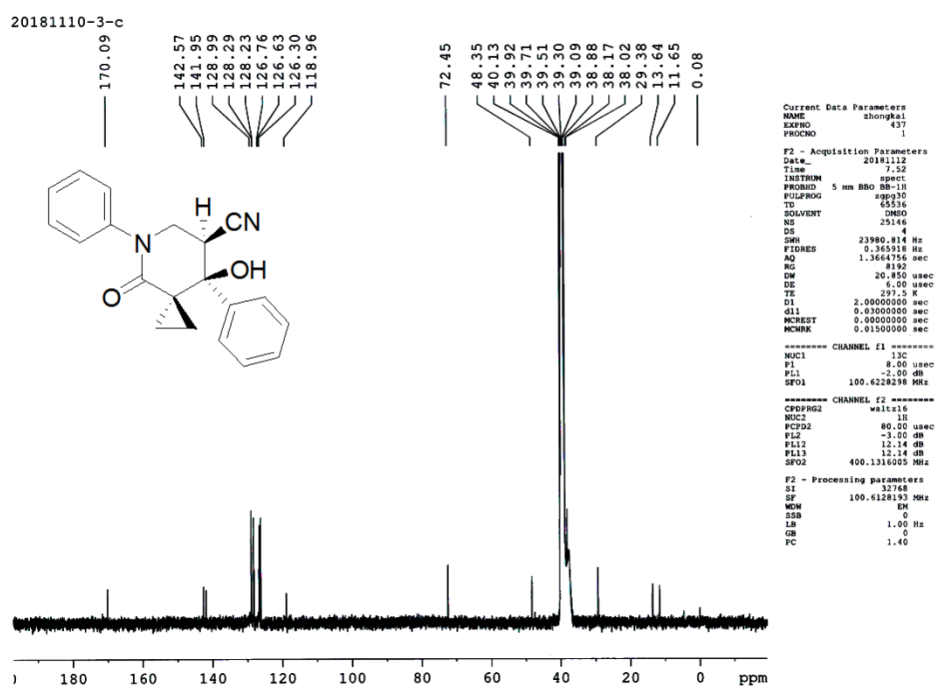

Figure 17.  $^1\text{H}$ -(upper) and  $^{13}\text{C}$ -NMR (lower) spectra of compound **4d**.

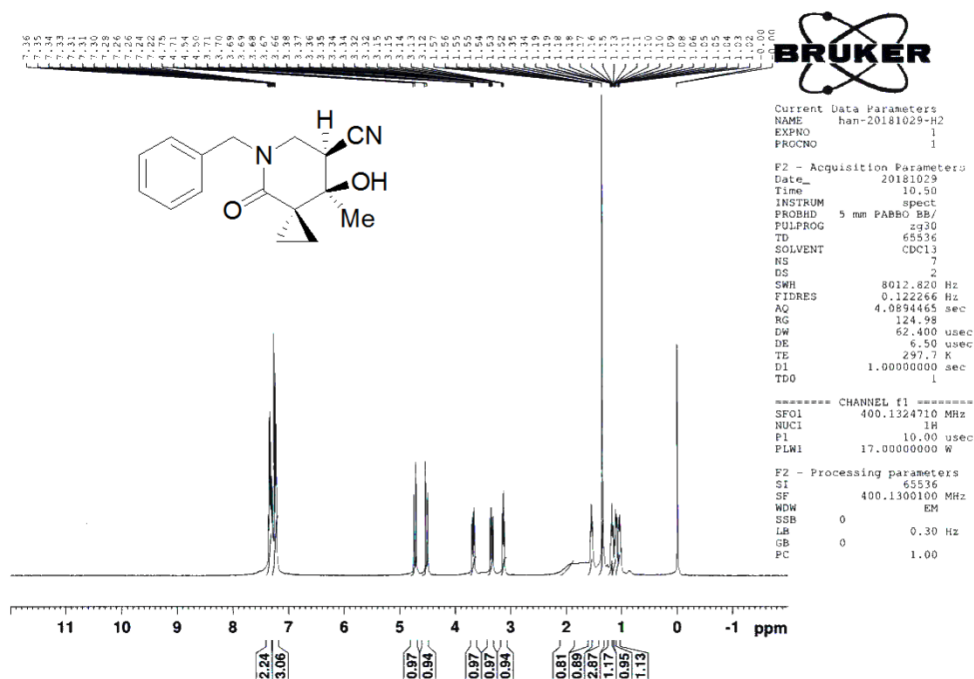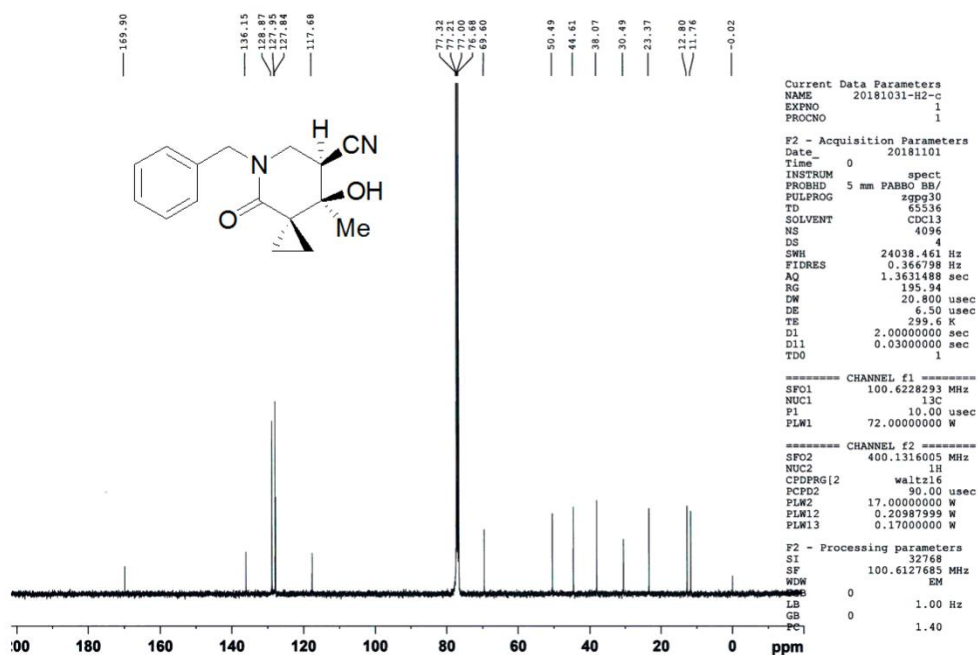

Figure 18. <sup>1</sup>H-(upper) and <sup>13</sup>C-NMR (lower) spectra of compound 4e.

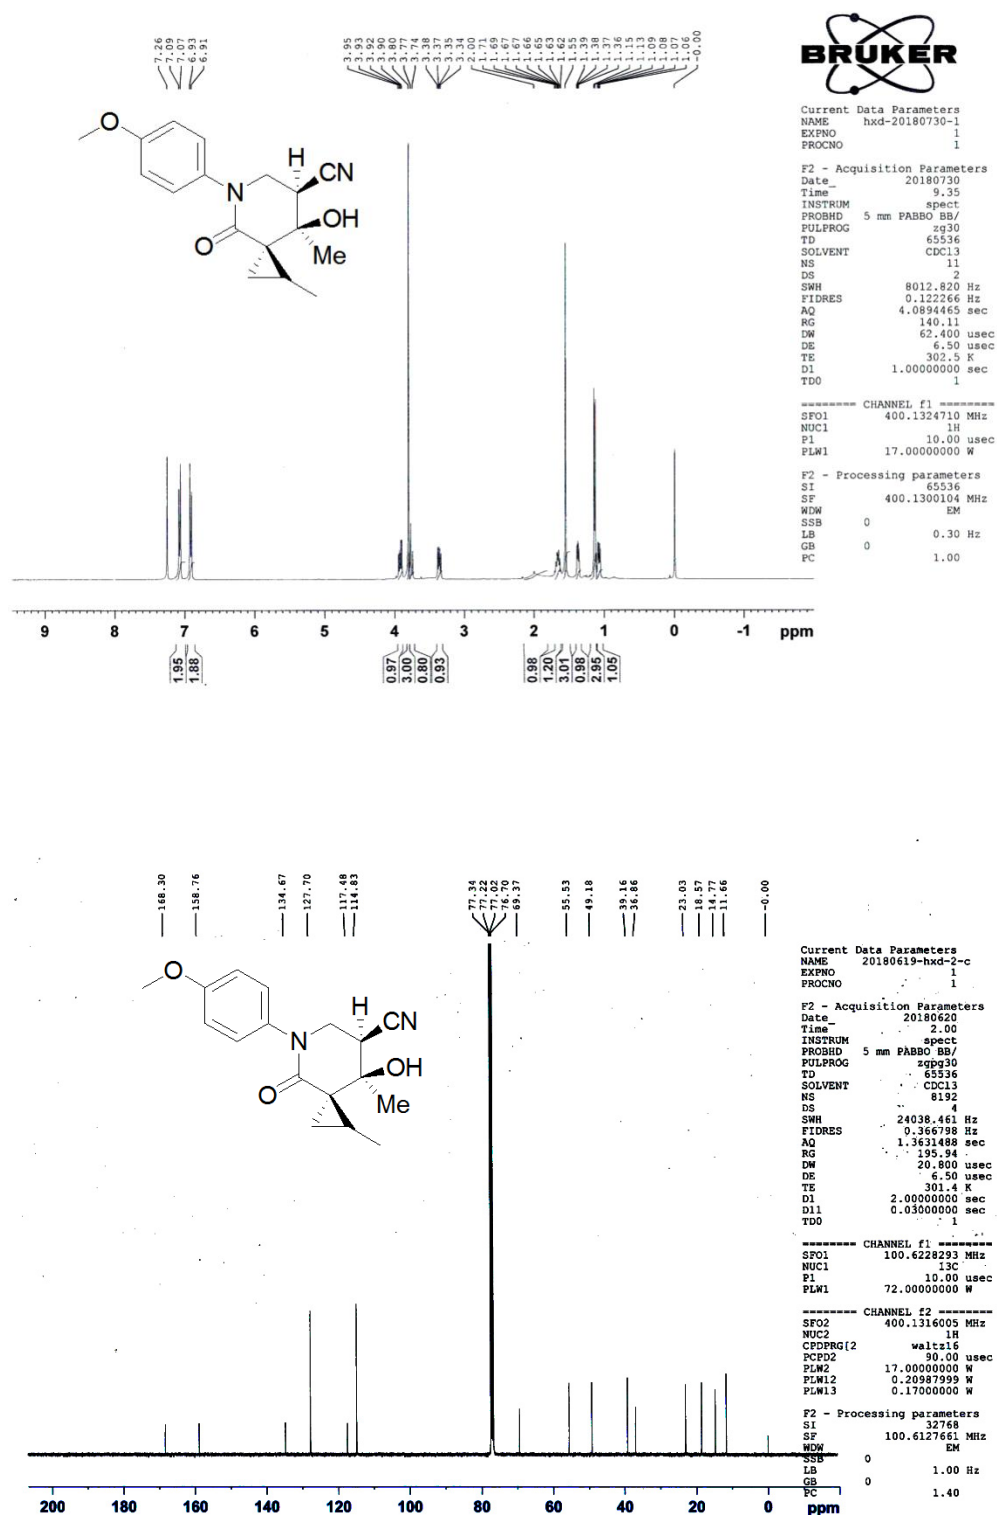

Figure 19. <sup>1</sup>H-(upper) and <sup>13</sup>C-NMR (lower) spectra of compound 4f.

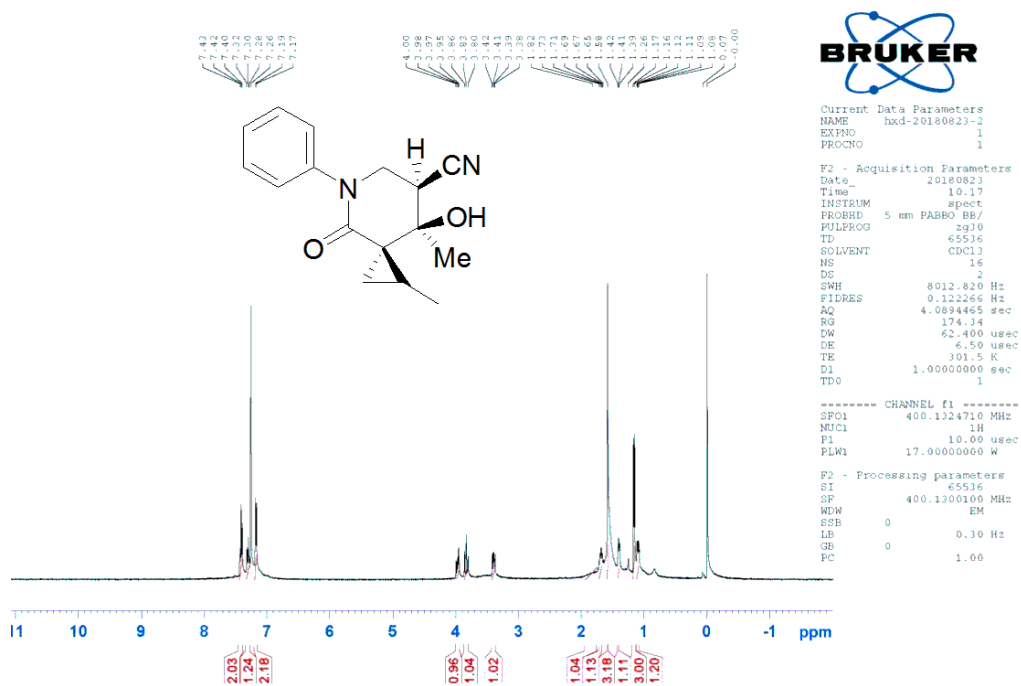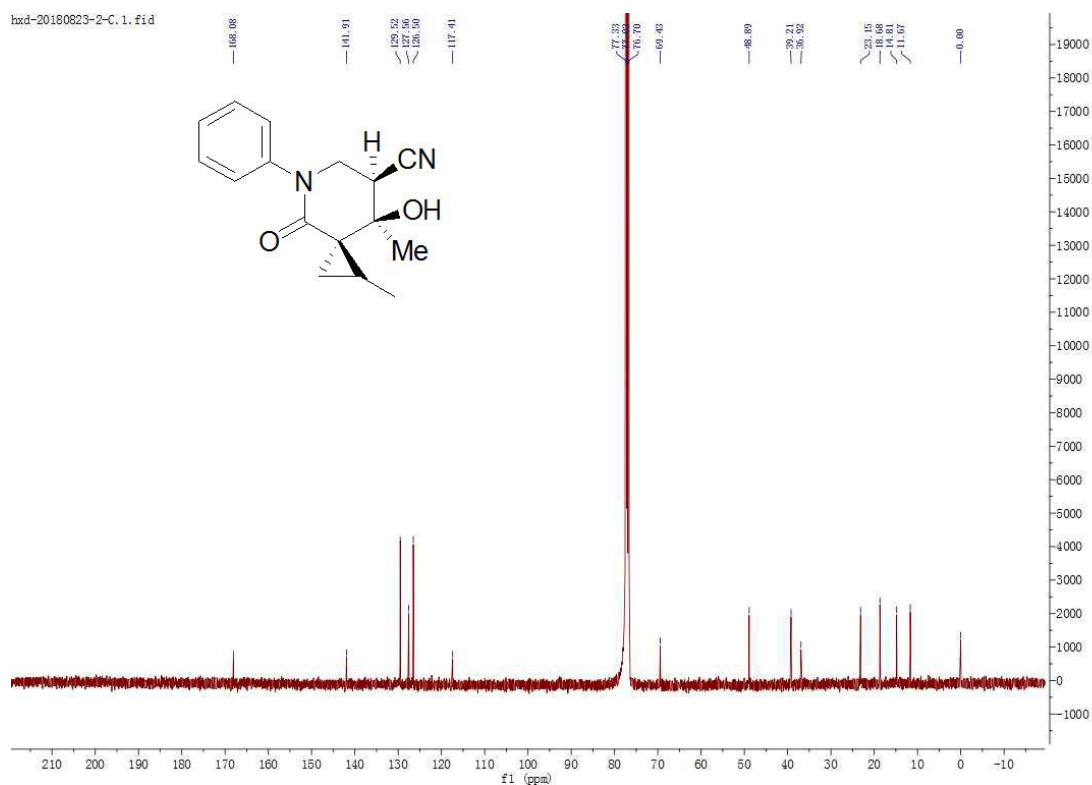

**Figure 20.**  $^1\text{H}$ -(upper) and  $^{13}\text{C}$ -NMR (lower) spectra of compound **4g**.

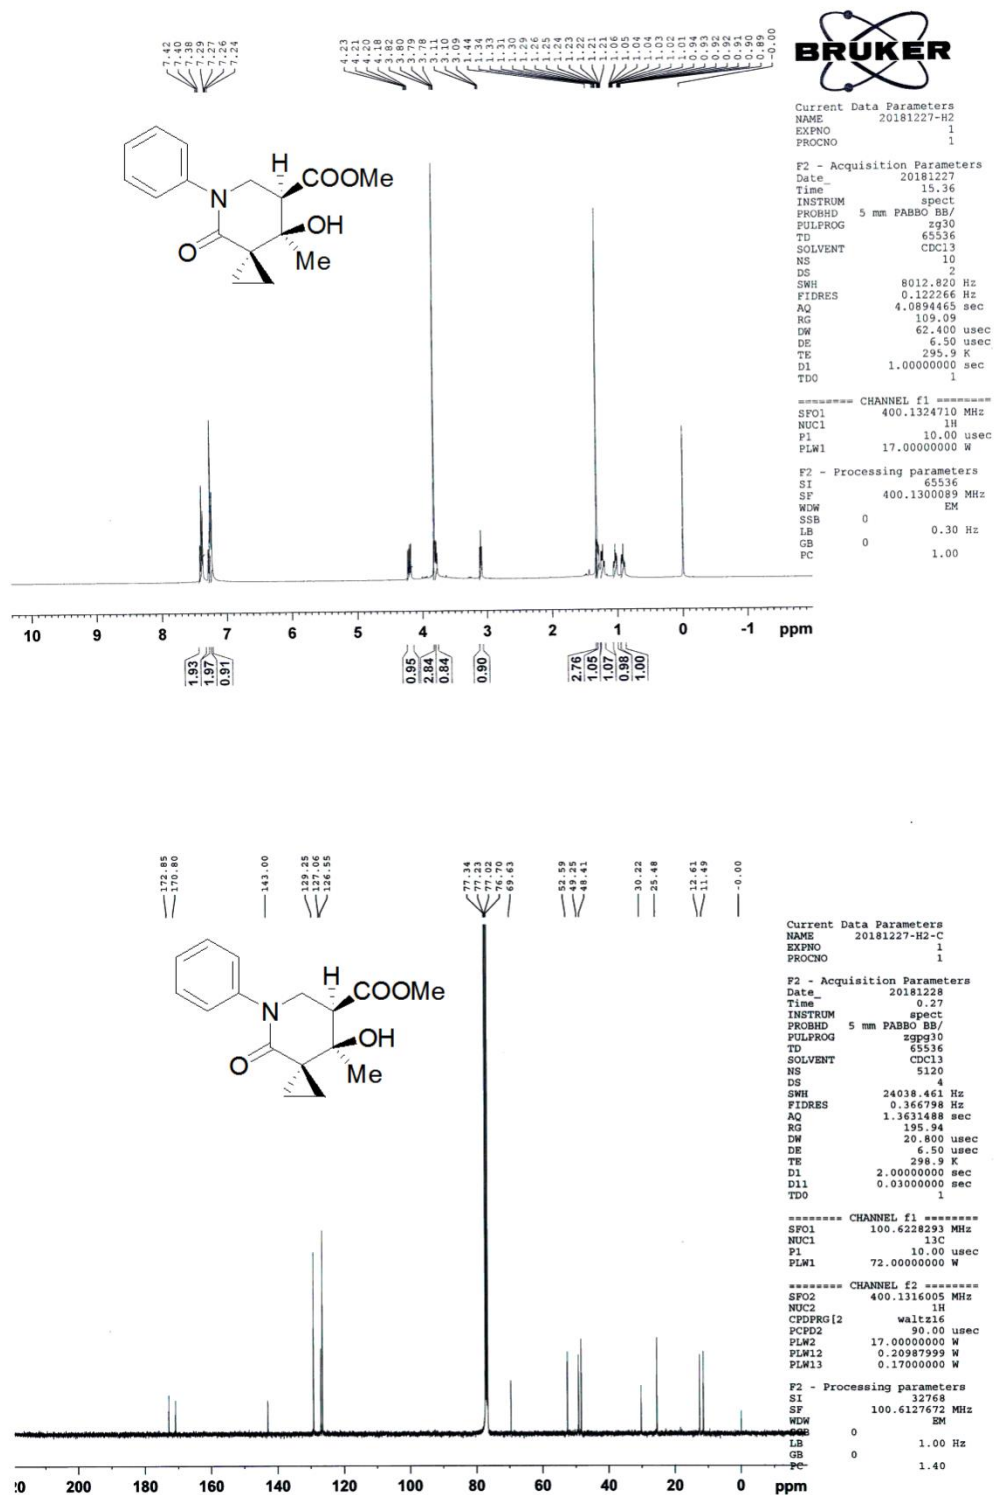

Figure 21. <sup>1</sup>H-(upper) and <sup>13</sup>C-NMR (lower) spectra of compound **4h**.

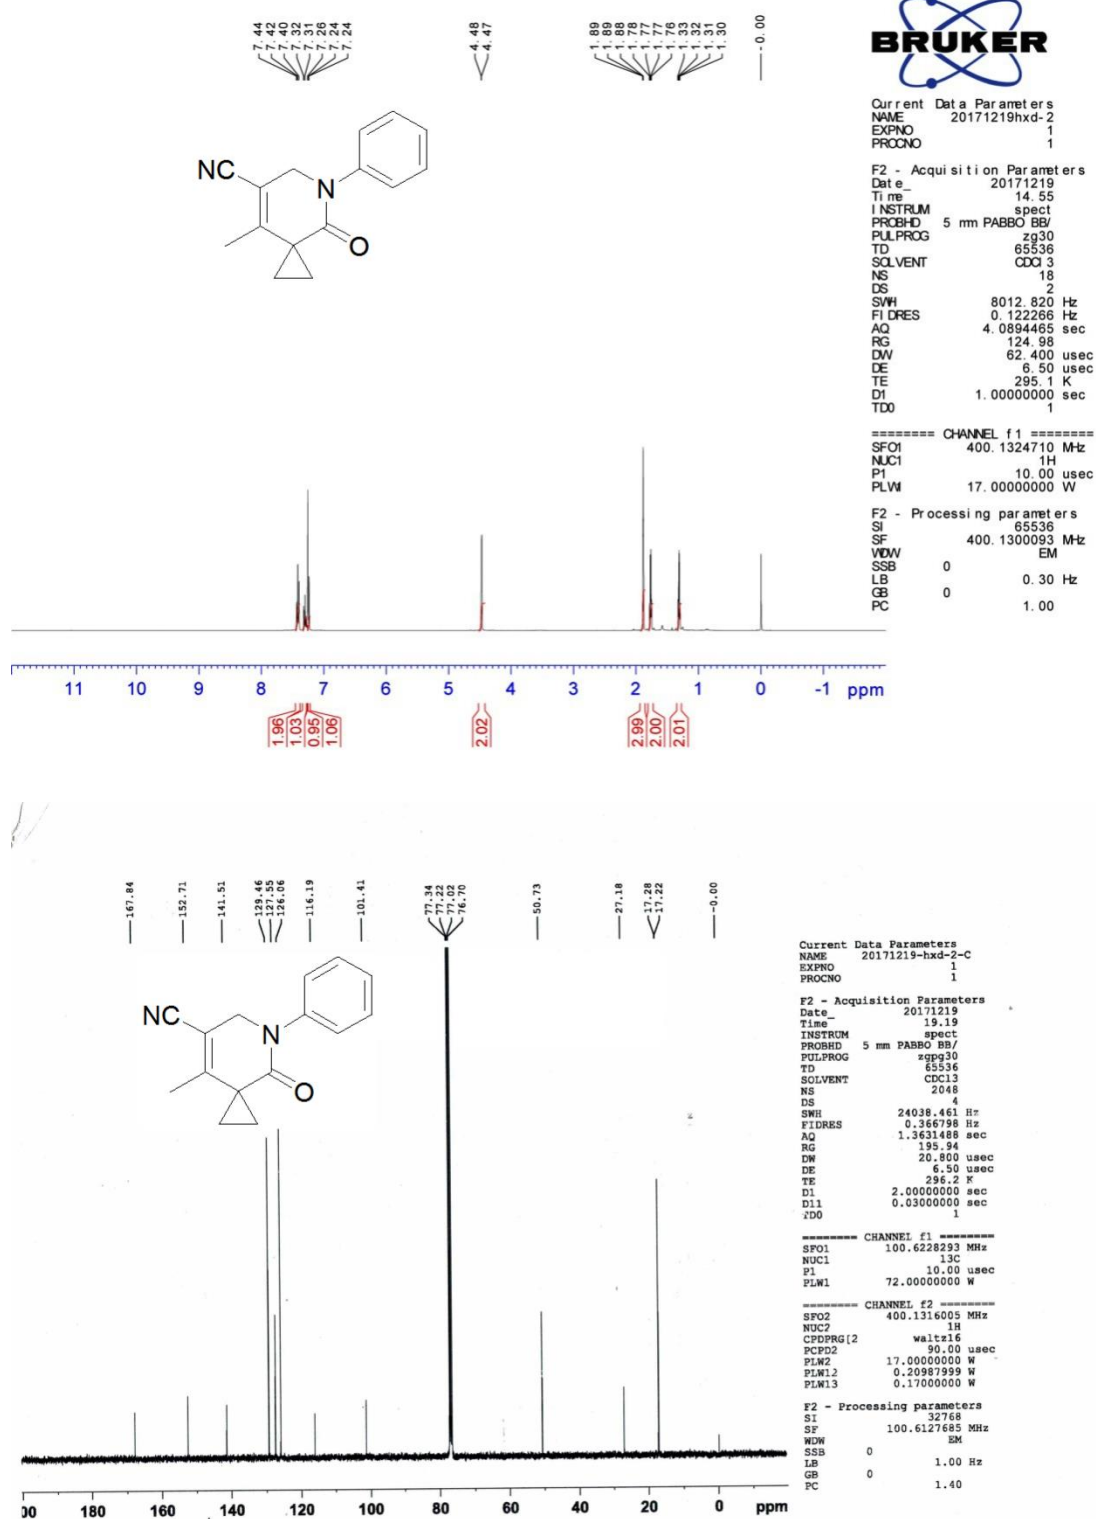

Figure 22. <sup>1</sup>H-(upper) and <sup>13</sup>C-NMR (lower) spectra of compound 5a.

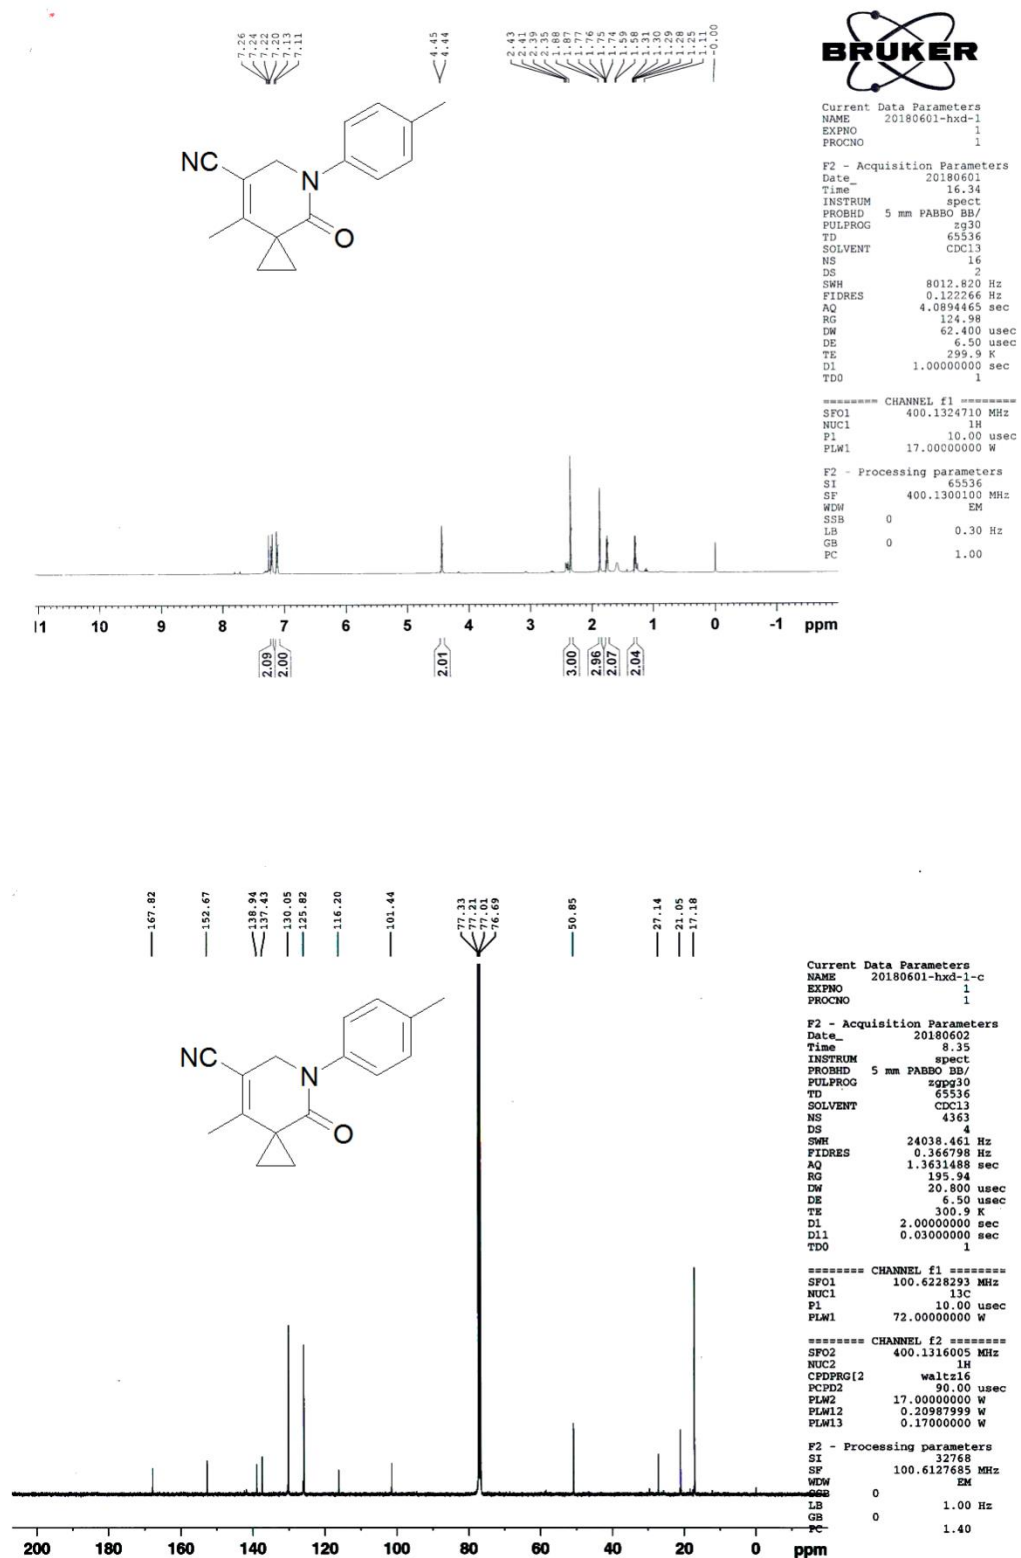

Figure 23. <sup>1</sup>H-(upper) and <sup>13</sup>C-NMR (lower) spectra of compound **5b**.



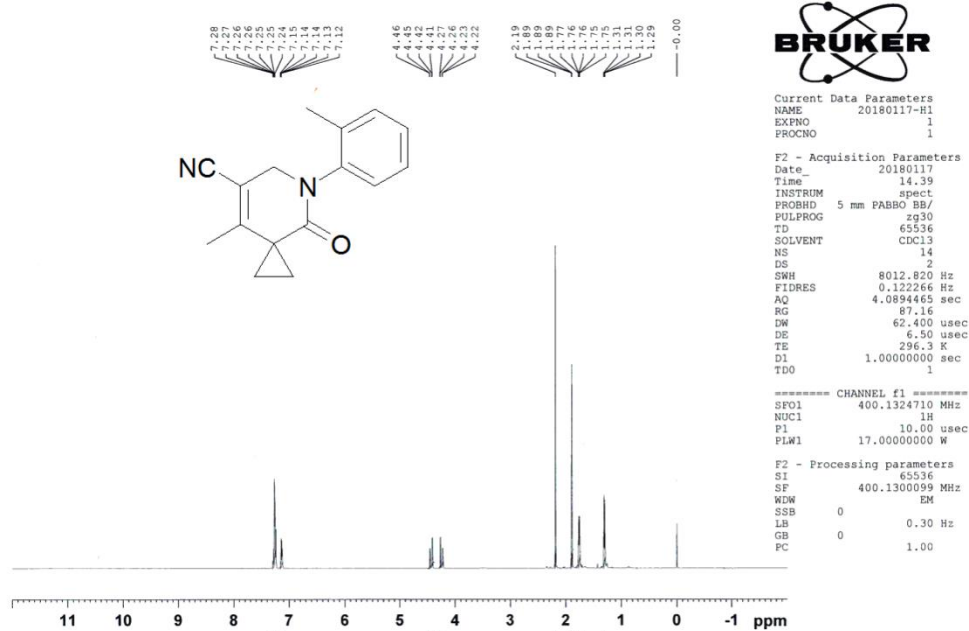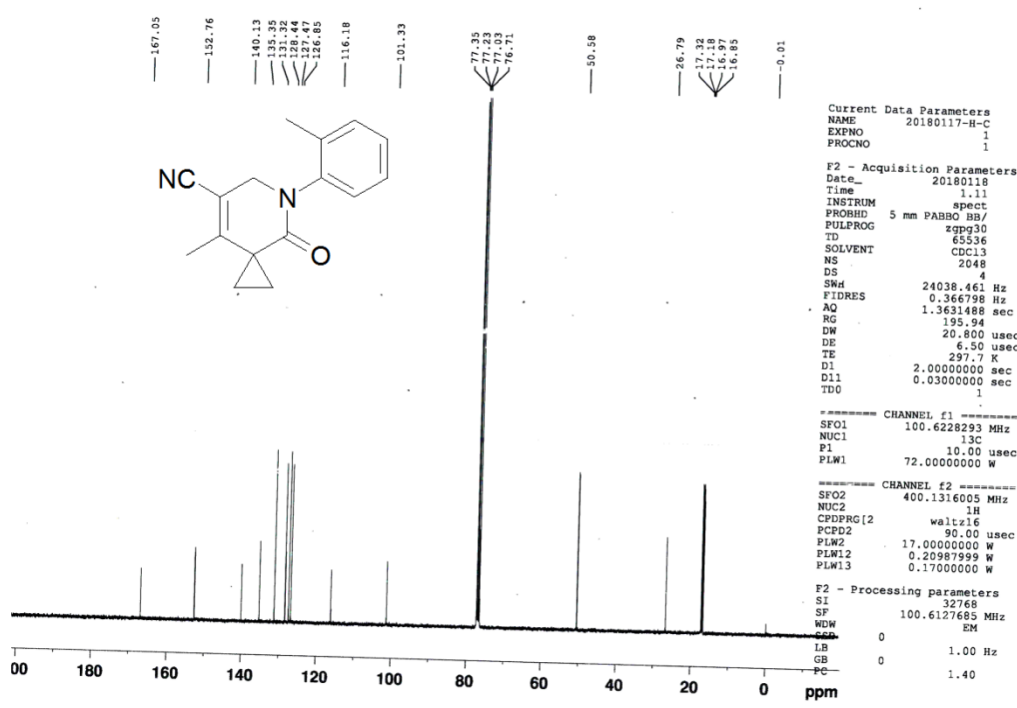

Figure 25. <sup>1</sup>H-(upper) and <sup>13</sup>C-NMR (lower) spectra of compound 5d.

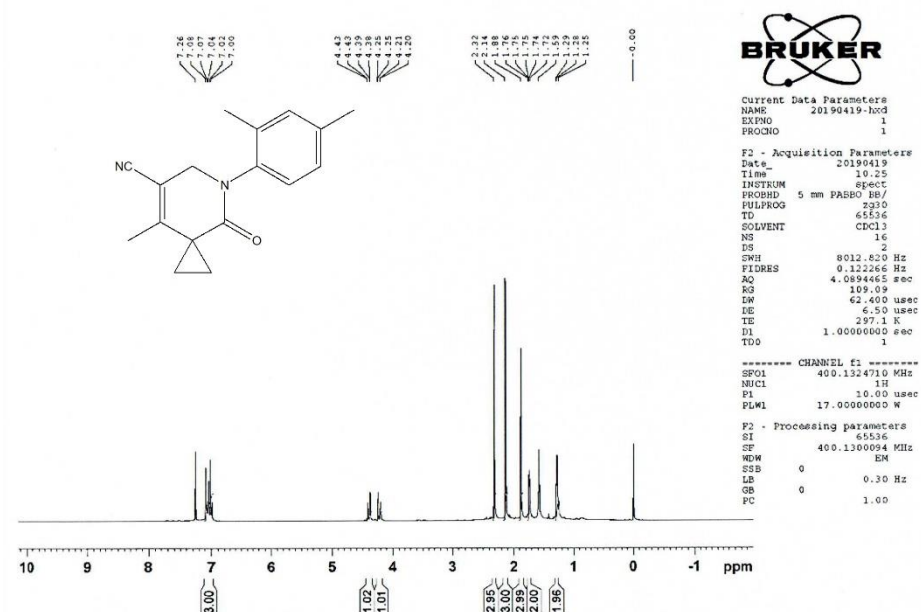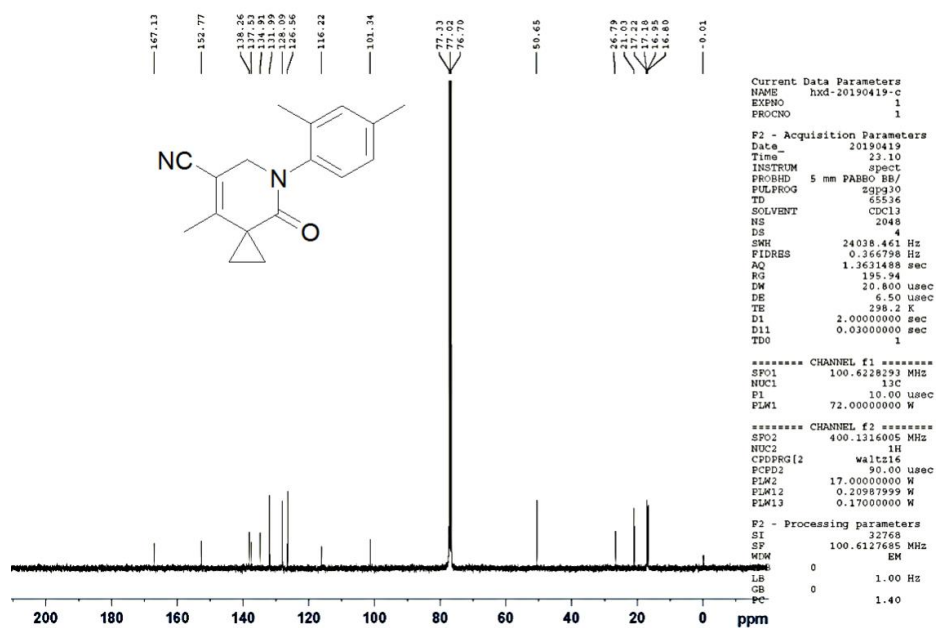

Figure 26. <sup>1</sup>H-(upper) and <sup>13</sup>C-NMR (lower) spectra of compound 5e.

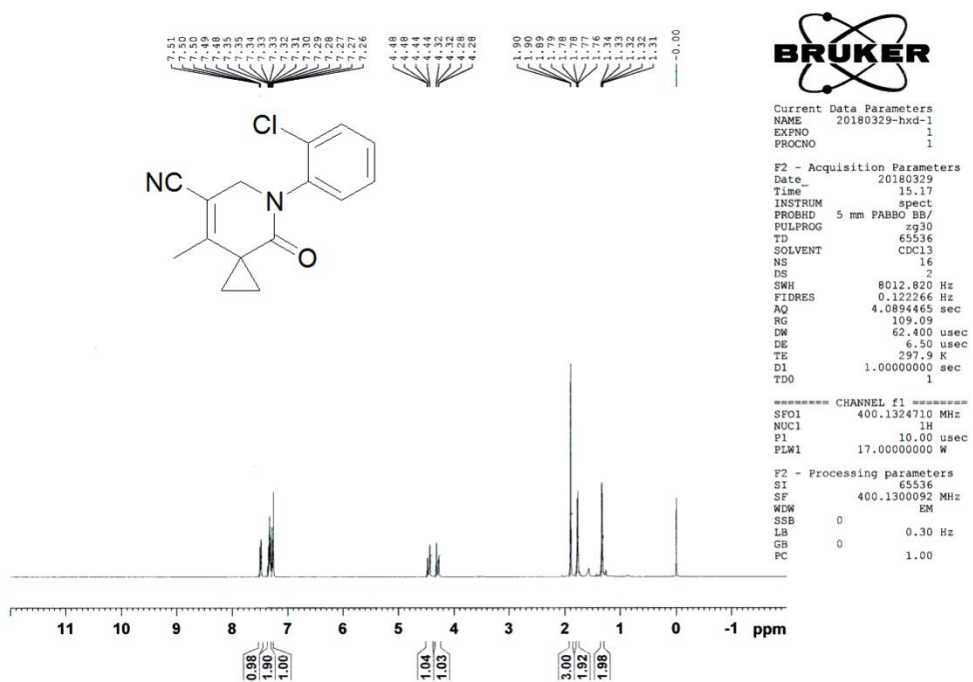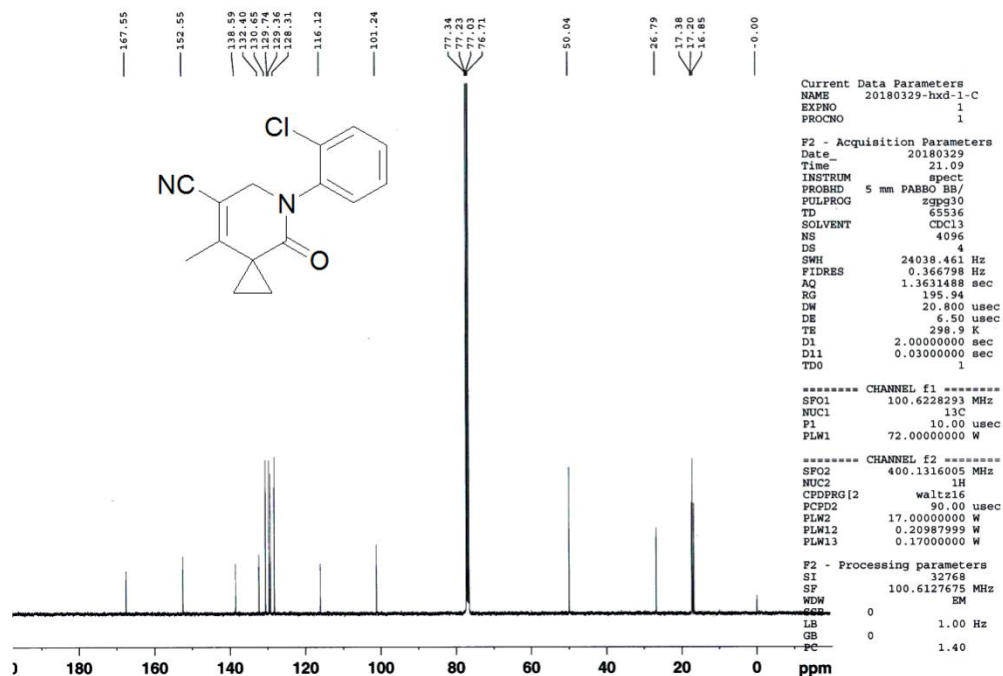

Figure 27. <sup>1</sup>H-(upper) and <sup>13</sup>C-NMR (lower) spectra of compound **5f**.

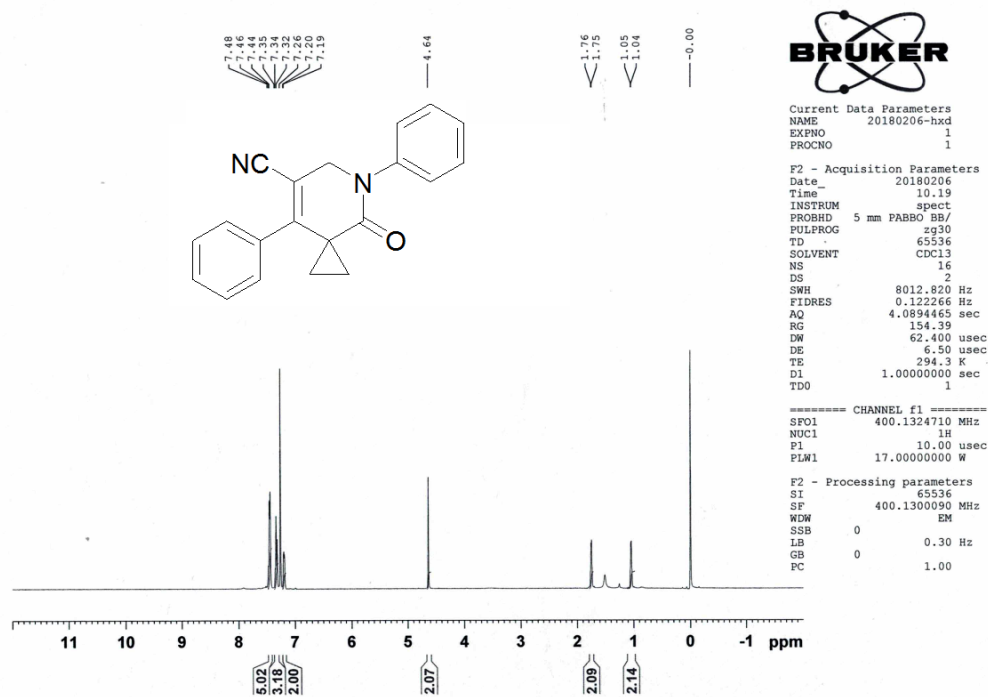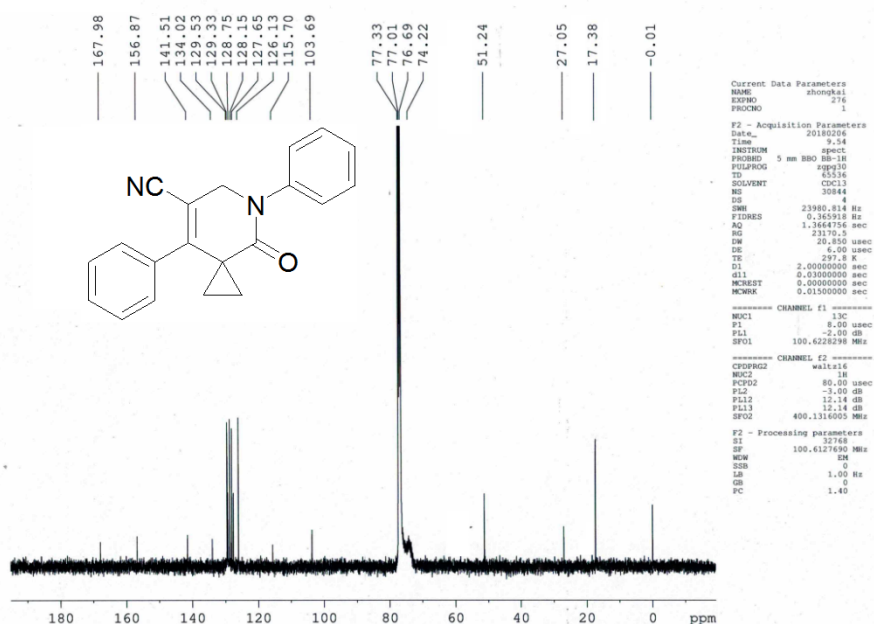

Figure 28. <sup>1</sup>H-(upper) and <sup>13</sup>C-NMR (lower) spectra of compound 5g.





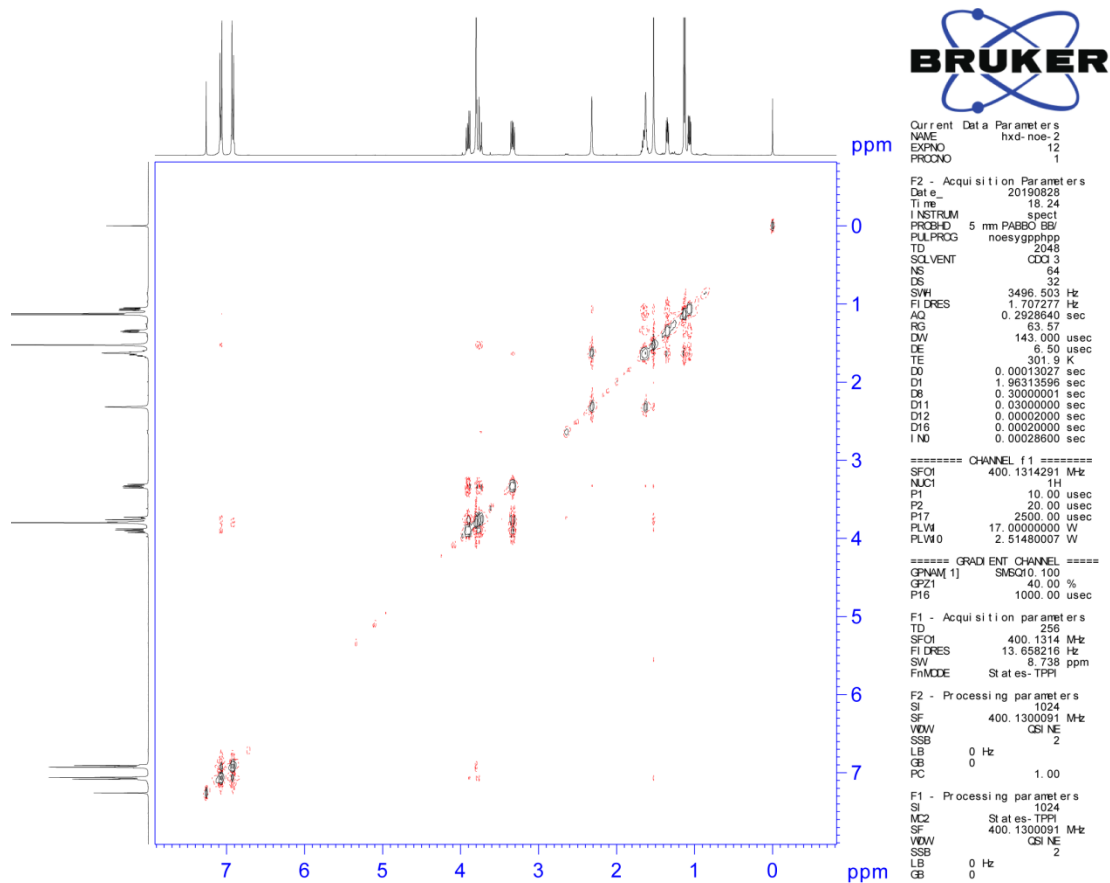

**Figure 31.** Noesy spectra of compound **4f**
